# Supplementary material for: Water-driven reversible switching of single-ion magnetism and proton conduction in a dysprosium sulfonate
Source: Royal Society of Chemistry journal article supplement (doi:10.1039/d2qi01761j), 2022-01-01
Supplement: d2qi01761j1.pdf [file d2qi01761j1.pdf]

## Water-driven reversible switching of single-ion magnetism in a dysprosium sulfonate

Dong Shao,<sup>a,e\*</sup> Wanjie Tang,<sup>a</sup> Zhijun Ruan,<sup>a</sup> Xiaodong Yang,<sup>a</sup> Le Shi,<sup>d</sup> Xiao-Qin Wei,<sup>\*b</sup>  
Zhengfang Tian,<sup>a</sup> Kusum Kumari<sup>c</sup> and Saurabh Kumar Singh<sup>\*c</sup>

<sup>a</sup> Hubei Key Laboratory of Processing and Application of Catalytic Materials, College of Chemistry and Chemical Engineering, Huanggang Normal University, Huanggang 438000, P. R. China

<sup>b</sup> Department of Material Science and Engineering, Shanxi Province Collaborative Innovation Center for Light Materials Modification and Application, Jinzhong University, Jinzhong, 030619, P. R. China.

<sup>c</sup> Department of Chemistry, Indian Institute of Technology Hyderabad, Kandi-502285, Sangareddy, Telangana, India.

<sup>d</sup> State Key Laboratory of Chemical Engineering, Stoddart Institute of Molecular Science, Department of Chemistry, Zhejiang University, Hangzhou 310027, P. R. China.

<sup>e</sup> State Key Laboratory of Coordination Chemistry, Nanjing University, Nanjing, 210023, P. R. China.

Email: shaodong@nju.edu.cn; sksingh@chy.iith.ac.in

**Table of Content**

|                                                                                                                                                                                                                                                                                                                                                                               |    |
|-------------------------------------------------------------------------------------------------------------------------------------------------------------------------------------------------------------------------------------------------------------------------------------------------------------------------------------------------------------------------------|----|
| Experimental Section .....                                                                                                                                                                                                                                                                                                                                                    | 5  |
| <b>Figure S1.</b> The photographs of a single crystal of <b>1</b> ·3H <sub>2</sub> O, the single crystal in X-ray diffractometer at different temperature, and the rehydrated single crystal at 300 K.....                                                                                                                                                                    | 7  |
| <b>Figure S2.</b> Thermal gravimetric analysis of <b>1</b> ·3H <sub>2</sub> O.....                                                                                                                                                                                                                                                                                            | 8  |
| <b>Figure S3.</b> The asymmetric units of <b>1</b> ·3H <sub>2</sub> O at 150 K, <b>1</b> ·H <sub>2</sub> O at 353 K and <b>1</b> ·3H <sub>2</sub> O <sub>re</sub> at 300 K.....                                                                                                                                                                                               | 9  |
| Table S1. Selected bond lengths (Å) and angles [°] for <b>1</b> ·3H <sub>2</sub> O.....                                                                                                                                                                                                                                                                                       | 10 |
| Table S2. Selected bond lengths (Å) and angles [°] for <b>1</b> ·H <sub>2</sub> O.....                                                                                                                                                                                                                                                                                        | 11 |
| Table S3. Continuous Shape Measure (CSM) analysis for eight-coordinated Dy(III) in <b>1</b> ·3H <sub>2</sub> O and <b>1</b> ·H <sub>2</sub> O.....                                                                                                                                                                                                                            | 12 |
| Table S4. Crystal Data and Structure Parameters for compound <b>1</b> ·3H <sub>2</sub> O <sub>re</sub> .....                                                                                                                                                                                                                                                                  | 13 |
| Table S5. Selected bond lengths (Å) and angles [°] for <b>1</b> ·3H <sub>2</sub> O <sub>re</sub> .....                                                                                                                                                                                                                                                                        | 14 |
| <b>Figure S4.</b> Temperature dependence of the powder X-ray diffraction (PXRD) patterns for <b>1</b> ·3H <sub>2</sub> O. The respective simulated PXRD patterns of <b>1</b> ·3H <sub>2</sub> O and <b>1</b> ·H <sub>2</sub> O were calculated on the basis of the single-crystal data via Mercury.....                                                                       | 15 |
| <b>Figure S5.</b> The experimental PXRD for rehydrated crystal sample of <b>1</b> ·3H <sub>2</sub> O <sub>re</sub> .....                                                                                                                                                                                                                                                      | 16 |
| <b>Figure S6.</b> Magnetization versus applied magnetic fields curves for <b>1</b> ·3H <sub>2</sub> O (a) and <b>1</b> ·H <sub>2</sub> O (b) collected at 2, 3, and 5 K. Magnetization versus field hysteresis measurements for <b>1</b> ·3H <sub>2</sub> O (c) and <b>1</b> ·H <sub>2</sub> O (d) collected at 1.8 K with a field sweep rate of 0.03 T s <sup>-1</sup> ..... | 17 |
| <b>Figure S7.</b> Temperature dependence of the in-phase ( $\chi'$ ) and out-of-phase ( $\chi''$ ) ac susceptibilities measured under zero dc field using a 100 Hz frequency for <b>1</b> ·3H <sub>2</sub> O (left) and <b>1</b> ·H <sub>2</sub> O (right).....                                                                                                               | 18 |
| <b>Figure S8.</b> Temperature dependence of the in-phase ( $\chi'$ ) and out-of-phase ( $\chi''$ ) part of the ac susceptibilities measured under 1 kOe dc field for <b>1</b> ·3H <sub>2</sub> O (left) and <b>1</b> ·H <sub>2</sub> O (right).....                                                                                                                           | 19 |
| <b>Figure S9.</b> Cole-Cole plots for <b>1</b> ·3H <sub>2</sub> O (up) and <b>1</b> ·H <sub>2</sub> O (down) under 1 kOe dc field....                                                                                                                                                                                                                                         | 20 |
| <b>Figure S10.</b> Natural logarithm of the relaxation time as a function of temperature for <b>1</b> ·3H <sub>2</sub> O (up) and <b>1</b> ·H <sub>2</sub> O (down). The black straight line represents the fit via the Orbach process.....                                                                                                                                   | 21 |
| Table S6. Relaxation fitting parameters from the least-square fitting of the Cole-Cole plots of <b>1</b> ·3H <sub>2</sub> O under 1 kOe dc field according to the generalized Debye model.....                                                                                                                                                                                | 22 |
| Table S7. Relaxation fitting parameters from the least-square fitting of the Cole-Cole plots of <b>1</b> ·H <sub>2</sub> O under 1 kOe dc field according to the generalized Debye model.....                                                                                                                                                                                 | 22 |
| <b>Figure S11.</b> Nyquist plots of <b>1</b> ·3H <sub>2</sub> O measured at 25 °C under different relative humidity in the 40-100% range. Solid red lines represent fitted semicircles, and the extracted values of conductivity were listed in Table S8.....                                                                                                                 | 23 |

|                                                                                                                                                                                                                                                                                                                |    |
|----------------------------------------------------------------------------------------------------------------------------------------------------------------------------------------------------------------------------------------------------------------------------------------------------------------|----|
| Table S8. The conductivity of $1 \cdot 3\text{H}_2\text{O}$ extracted from impedance spectra gathered at 25 °C under variable indicated relative humidity. ....                                                                                                                                                | 23 |
| <b>Figure S12.</b> Nyquist plots of $1 \cdot \text{H}_2\text{O}$ measured at different temperature (298 – 383 K) under 40% relative humidity. Solid red lines represent fitted semicircles. ....                                                                                                               | 24 |
| <b>Figure S13.</b> Hydrogen-bonded supramolecular 3D structures of $1 \cdot 3\text{H}_2\text{O}$ (up) and $1 \cdot \text{H}_2\text{O}$ (down). ....                                                                                                                                                            | 25 |
| <b>Figure S14.</b> 1D hydrogen-bonded $\text{H}_2\text{O}$ chains in $1 \cdot 3\text{H}_2\text{O}$ (up) and $1 \cdot \text{H}_2\text{O}$ (down) along $b$ axis direction. ....                                                                                                                                 | 26 |
| Computational Details.....                                                                                                                                                                                                                                                                                     | 27 |
| Table S9. RASSI-SO computed low-lying 21 spin-free sextet states and the spin-orbit coupled (Kramer doublets) for Dy in complex $1 \cdot 3\text{H}_2\text{O}$ at 300K. All the values are reported here in $\text{cm}^{-1}$ . ....                                                                             | 28 |
| Table S10. RASSI-SO computed low-lying 21 spin-free sextet states and the spin-orbit coupled (Kramer doublets) for Dy in complex $1 \cdot \text{H}_2\text{O}$ at 400K. All the values are reported here in $\text{cm}^{-1}$ . ....                                                                             | 29 |
| Table S11. SINGLE_ANISO computed $g$ -tensors, the angle of deviation from ground state $g_{zz}$ orientation and relative energies of eight low lying Kramers doublets for $1 \cdot 3\text{H}_2\text{O}$ and $1 \cdot \text{H}_2\text{O}$ . ....                                                               | 30 |
| Table S12. SINGLE_ANISO computed crystal field parameters for $1 \cdot 3\text{H}_2\text{O}$ and $1 \cdot \text{H}_2\text{O}$ . ....                                                                                                                                                                            | 30 |
| Table S13. SINGLE_ANISO computed wave function decomposition analysis for Dy centre in complex $1 \cdot 3\text{H}_2\text{O}$ . The major dominating values are kept in bold. ....                                                                                                                              | 31 |
| Table S14. SINGLE_ANISO computed wave function decomposition analysis for Dy centre in complex $1 \cdot \text{H}_2\text{O}$ . The major dominating values are kept in bold. ....                                                                                                                               | 31 |
| <b>Figure S15.</b> Ab initio computed magnetic relaxation pathway of the a) $1 \cdot 3\text{H}_2\text{O}$ and b) $1 \cdot \text{H}_2\text{O}$ . The grey line indicates the KDs as a function of magnetic moments. The blue, red and green lines represent thermal, QTM, and possible Orbach relaxations. .... | 32 |
| <b>Figure S16.</b> LoProp charge for the two Dy centers in a) Complex $1 \cdot 3\text{H}_2\text{O}$ and b) Complex $1 \cdot \text{H}_2\text{O}$ . (in core as well as in the vicinity of neighboring water molecules) Color code: Dy (Green); N (blue), O (red), C (grey), H(white). ....                      | 33 |
| <b>Figure S17.</b> SINGLE_ANISO fitting for $\chi_M T$ vs $T$ for a) Complex $1 \cdot 3\text{H}_2\text{O}$ and b) Complex $1 \cdot \text{H}_2\text{O}$ . Red (calculated); black (experimental). ....                                                                                                          | 34 |
| <b>Figure S18.</b> Experimental versus Calculated $M$ vs $H$ plot at different temperatures (2K, 3K, 5K) for a) Complex $1 \cdot 3\text{H}_2\text{O}$ and b) Complex $1 \cdot \text{H}_2\text{O}$ . ....                                                                                                       | 34 |
| <b>Figure S19.</b> DFT calculated beta spin density plot for a) Complex $1 \cdot 3\text{H}_2\text{O}$ b) Complex $1 \cdot \text{H}_2\text{O}$ at iso value $0.000433 \text{ e}^-/\text{bohr}^3$ . Color code: N (blue), O (red), S (yellow), C (grey), H(white). ....                                          | 34 |

|                                                                                                                                              |    |
|----------------------------------------------------------------------------------------------------------------------------------------------|----|
| Table S15. Basis functions used in <i>ab initio</i> CASSCF calculations using OpenMolcas code.<br>.....                                      | 35 |
| Table S16. Hydrogen optimized coordinates for mononuclear model of $1 \cdot 3\text{H}_2\text{O}$ and $1 \cdot \text{H}_2\text{O}$ .<br>..... | 35 |
| Table S17. The possible hydrogen bonds in $1 \cdot 3\text{H}_2\text{O}$ at 150 K calculated by PLATON. .                                     | 40 |
| Table S18. The possible hydrogen bonds in $1 \cdot 3\text{H}_2\text{O}$ at 300 K calculated by PLATON. .                                     | 40 |
| Table S19. The possible hydrogen bonds in $1 \cdot \text{H}_2\text{O}$ at 353 K calculated by PLATON.....                                    | 41 |
| Table S20. The possible hydrogen bonds in $1 \cdot \text{H}_2\text{O}$ at 400 K calculated by PLATON.....                                    | 41 |
| Reference.....                                                                                                                               | 42 |

## Experimental Section

**General Procedure.** Powder X-ray diffraction data (PXRD) were recorded on a Bruker D8 Advance diffractometer with Cu K $\alpha$  X-ray source ( $\lambda = 1.54056 \text{ \AA}$ ) operated at 40 kV and 40 mA. Simulated PXRD pattern was obtained from the Mercury software. Infrared spectra (IR) data were measured on KBr pellets using a Nexus 870 FT-IR spectrometer in the range of 4000-400  $\text{cm}^{-1}$ . Elemental analyses of C, H, and N were performed at an Elementar Vario MICRO analyzer. Thermal gravimetric analysis (TGA) was measured in Al<sub>2</sub>O<sub>3</sub> crucibles using a PerkinElmer Thermal Analysis in the temperature range of 30-600 °C under an argon atmosphere. Proton conductivity measurements were performed using a quasi-four-electrode AC impedance technique with a Solartron 1260 impedance/gain-phase analyzer. The single crystals samples were compressed to 2.5 mm diameter, which were connected to gold wires using silver paste. The sample pellet was measured at a frequency range of 1 Hz to 1 GHz in the temperature range of 25–110 °C and in different RH. The conductivity of the samples was deduced from the Debye semicircle in the Nyquist plot.

**Magnetic Measurements.** Magnetic susceptibility measurements from 2 to 300 K with dc field up to 70 kOe were performed using a Quantum Design SQUID VSM magnetometer on the grounded powders from the single crystals of the compounds. Alternative current (ac) magnetic susceptibility data were collected in zero direct current (dc) field or 1000 Oe dc field in the temperature range of 2-20 K, under an ac field of 2 Oe, oscillating at frequencies in the range of 1-1000 Hz. All magnetic data were corrected for the diamagnetism of the sample holder and of the diamagnetic contribution of the sample using Pascal's constants.

**X-ray Crystallography.** Single crystal X-ray crystallographic data were collected on a Bruker D8 Venture diffractometer with a CCD area detector (Mo-K $\alpha$  radiation,  $\lambda = 0.71073 \text{ \AA}$ ) at different temperature controlled by Oxford Cryosystems low-temperature device. The unit cell parameters and data collection were determined by the APEXII program. The data were integrated and corrected for Lorentz and polarization effects using SAINT.<sup>S1</sup> Absorption corrections were applied with SADABS.<sup>S2</sup> The structures

were solved by direct methods and refined by full-matrix least-squares method on  $F^2$  using the SHELXTL<sup>S3</sup> crystallographic software package integrated in Olex 2.<sup>S4</sup> All the non-hydrogen atoms were refined anisotropically. Hydrogen atoms of the organic ligands were refined as riding on the corresponding non-hydrogen atoms. Additional details of the data collections and structural refinement parameters are provided in Table 1. Selected bond lengths and angles of  $1 \cdot 3\text{H}_2\text{O}$  and  $1 \cdot \text{H}_2\text{O}$  are listed in Table S1 and S2. CCDC 2196277 (150 K), 2196278 (300 K), 2196279 (353 K), and 2196280 (400 K) are the supplementary crystallographic data for this paper. They can be obtained freely from the Cambridge Crystallographic Data Centre via [www.ccdc.cam.ac.uk/data\\_request/cif](http://www.ccdc.cam.ac.uk/data_request/cif).

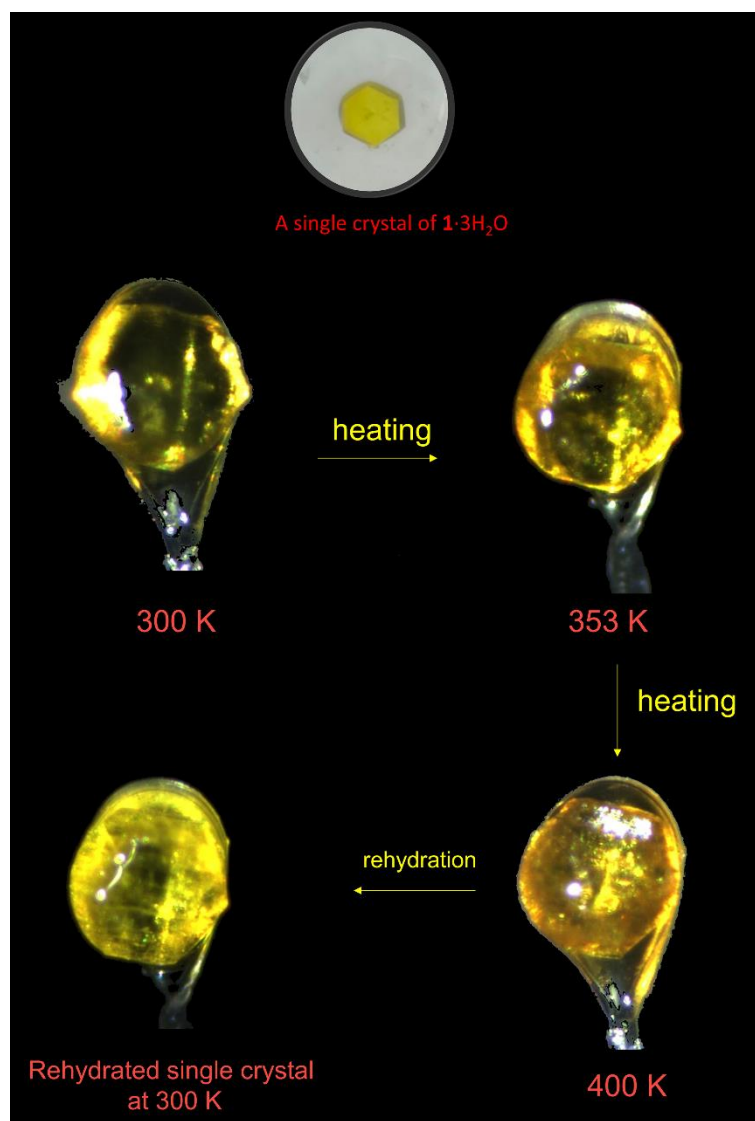

**Figure S1.** The photographs of a single crystal of  $1 \cdot 3\text{H}_2\text{O}$ , the single crystal in X-ray diffractometer at different temperature, and the rehydrated single crystal at 300 K.

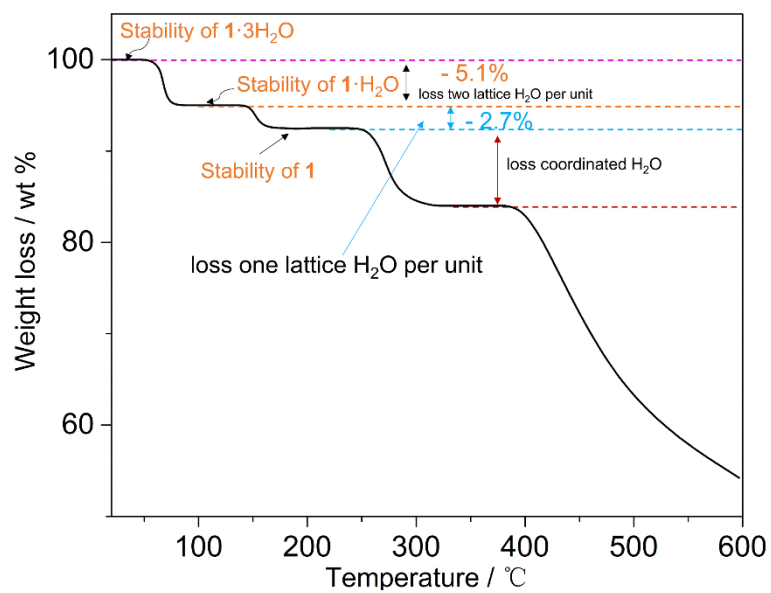

**Figure S2.** Thermal gravimetric analysis of  $1 \cdot 3\text{H}_2\text{O}$ .



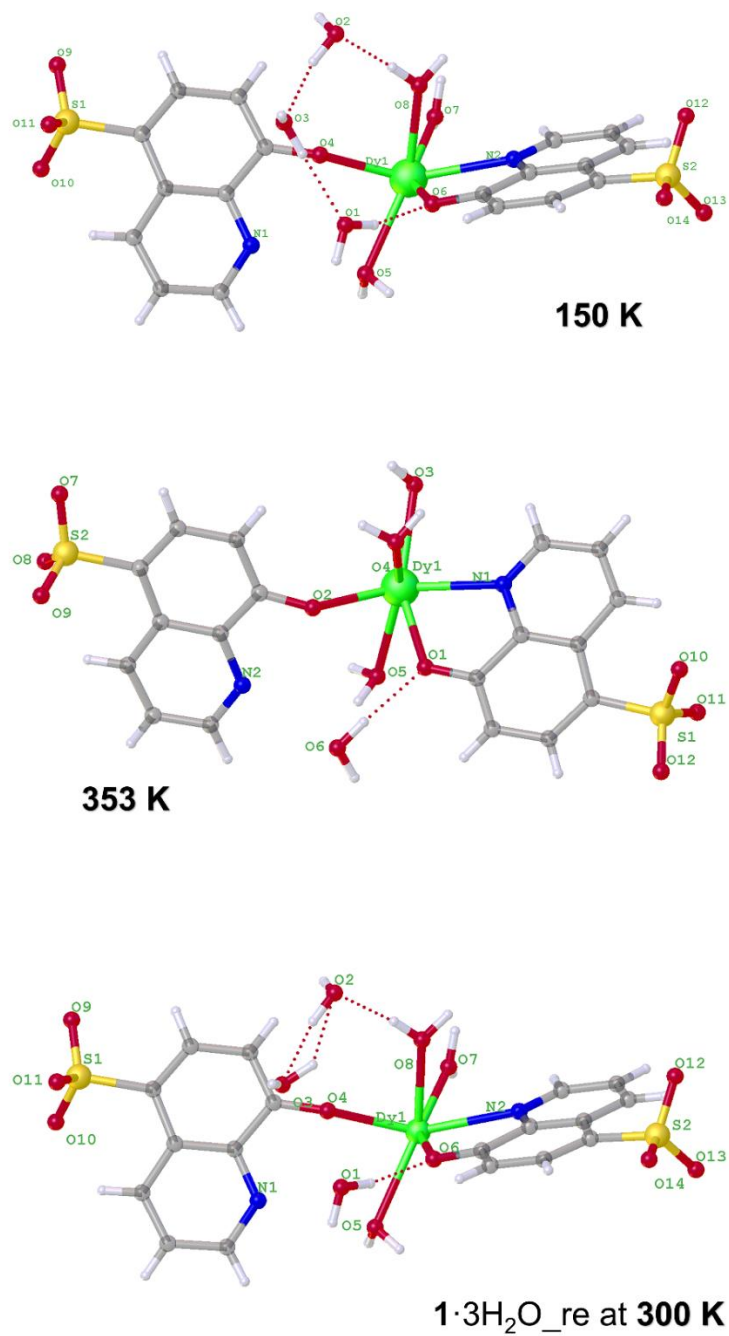

**Figure S3.** The asymmetric units of  $1 \cdot 3\text{H}_2\text{O}$  at 150 K,  $1 \cdot \text{H}_2\text{O}$  at 353 K and  $1 \cdot 3\text{H}_2\text{O\_re}$  at 300 K.

**Table S1.** Selected bond lengths (Å) and angles [°] for **1**·3H<sub>2</sub>O.

| Parameter               | Value / Å, ° |            |
|-------------------------|--------------|------------|
| <i>T</i> / K            | <b>150</b>   | <b>300</b> |
| Dy1-O4                  | 2.2286(14)   | 2.2306(15) |
| Dy1-O5                  | 2.4856(15)   | 2.4878(16) |
| Dy1-O6                  | 2.2817(15)   | 2.2808(15) |
| Dy1-O7                  | 2.3678(15)   | 2.3726(17) |
| Dy1-O8                  | 2.3650(16)   | 2.3722(18) |
| Dy1-O10 <sup>1</sup>    | 2.4100(15)   | 2.4107(15) |
| Dy1-O13 <sup>2</sup>    | 2.3232(15)   | 2.3247(16) |
| Dy-O <sub>average</sub> | 2.3517       | 2.3542     |
| Dy1-N2                  | 2.5380(17)   | 2.5412(17) |
| O4-Dy1-O5               | 77.36(5)     | 77.12(6)   |
| O4-Dy1-O6               | 90.15(5)     | 90.07(6)   |
| O4-Dy1-O7               | 108.81(6)    | 108.27(7)  |
| O4-Dy1-O8               | 75.76(5)     | 75.49(6)   |
| O4-Dy1-O10 <sup>1</sup> | 75.15(5)     | 75.66(6)   |
| O4-Dy1-O13 <sup>2</sup> | 145.76(6)    | 146.08(6)  |
| O5-Dy1-N2               | 119.63(5)    | 119.98(5)  |
| O7-Dy1-O5               | 142.84(5)    | 142.96(6)  |
| O7-Dy1-O10 <sup>1</sup> | 74.15(5)     | 73.73(6)   |
| O7-Dy1-N2               | 79.25(6)     | 79.60(6)   |
| O6-Dy1-N2               | 66.99(5)     | 66.87(6)   |
| O8-Dy1-O5               | 140.10(5)    | 140.32(6)  |
| O8-Dy1-O7               | 74.59(6)     | 73.79(7)   |

**Table S2.** Selected bond lengths (Å) and angles [°] for **1**·H<sub>2</sub>O.

| Parameter                | Value / Å, ° |            |
|--------------------------|--------------|------------|
| <i>T</i> / K             | <b>353</b>   | <b>400</b> |
| Dy1-O1                   | 2.254(3)     | 2.238(5)   |
| Dy1-O2                   | 2.230(3)     | 2.233(5)   |
| Dy1-O3                   | 2.403(4)     | 2.391(7)   |
| Dy1-O4                   | 2.450(4)     | 2.441(7)   |
| Dy1-O5                   | 2.528(5)     | 2.611(10)  |
| Dy1-O8 <sup>1</sup>      | 2.349(3)     | 2.342(6)   |
| Dy1-O11 <sup>2</sup>     | 2.295(3)     | 2.281(6)   |
| Dy-O <sub>average</sub>  | 2.358        | 2.352      |
| Dy1-N1                   | 2.539(3)     | 2.532(6)   |
| O1-Dy1-O3                | 145.37(13)   | 146.0(3)   |
| O1-Dy1-O4                | 84.35(13)    | 85.8(2)    |
| O1-Dy1-O5                | 70.54(15)    | 69.5(3)    |
| O1-Dy1-O8 <sup>1</sup>   | 139.75(13)   | 138.8(2)   |
| O1-Dy1-O11 <sup>2</sup>  | 106.78(13)   | 104.5(2)   |
| O1-Dy1-N1                | 66.72(11)    | 67.03(18)  |
| O2-Dy1-O1                | 82.77(12)    | 81.9(2)    |
| O2-Dy1-N1                | 136.99(12)   | 136.9(2)   |
| O3-Dy1-O4                | 70.83(14)    | 70.5(3)    |
| O3-Dy1-N1                | 82.99(13)    | 82.7(2)    |
| O5-Dy1-N1                | 114.09(15)   | 113.4(3)   |
| O8 <sup>1</sup> -Dy1-O3  | 74.83(15)    | 75.3(3)    |
| O11 <sup>2</sup> -Dy1-O4 | 137.08(14)   | 138.1(2)   |

**Table S3.** Continuous Shape Measure (CSM) analysis for eight-coordinated Dy(III) in  $1 \cdot 3\text{H}_2\text{O}$  and  $1 \cdot \text{H}_2\text{O}$ .

| Eight-coordinated coordination sphere label | Symmetry              | CSM parameters                |              |                              |              | Determined coordination geometry |
|---------------------------------------------|-----------------------|-------------------------------|--------------|------------------------------|--------------|----------------------------------|
|                                             |                       | $1 \cdot 3\text{H}_2\text{O}$ |              | $1 \cdot \text{H}_2\text{O}$ |              |                                  |
| <i>T</i> / K                                |                       | <b>150</b>                    | <b>300</b>   | <b>353</b>                   | <b>400</b>   |                                  |
| OP-8                                        | D <sub>8h</sub>       | 29.999                        | 30.119       | 30.959                       | 30.837       |                                  |
| HPY-8                                       | C <sub>7v</sub>       | 22.694                        | 22.639       | 22.225                       | 22.270       |                                  |
| HBPY-8                                      | D <sub>6h</sub>       | 15.267                        | 15.132       | 14.287                       | 14.456       |                                  |
| CU-8                                        | O <sub>h</sub>        | 11.006                        | 11.023       | 8.683                        | 8.774        |                                  |
| SAPR-8                                      | <b>D<sub>4d</sub></b> | <b>1.027</b>                  | <b>1.052</b> | <b>0.909</b>                 | <b>0.856</b> | <b>SAPR-8</b>                    |
| TDD-8                                       | D <sub>2d</sub>       | 1.315                         | 1.305        | 2.738                        | 2.647        |                                  |
| JGBF-8                                      | D <sub>2d</sub>       | 12.769                        | 12.557       | 13.293                       | 13.443       |                                  |
| JETBPY-8                                    | D <sub>3h</sub>       | 26.913                        | 27.125       | 26.975                       | 27.195       |                                  |
| JBTP-8                                      | C <sub>2v</sub>       | 1.679                         | 1.692        | 2.016                        | 1.909        |                                  |
| BTPR-8                                      | C <sub>2v</sub>       | 1.643                         | 1.677        | 2.259                        | 2.151        |                                  |
| JSD-8                                       | D <sub>2d</sub>       | 2.711                         | 2.700        | 4.101                        | 4.015        |                                  |
| TT-8                                        | T <sub>d</sub>        | 11.588                        | 11.604       | 9.082                        | 9.186        |                                  |
| ETBPY-8                                     | D <sub>3h</sub>       | 23.695                        | 23.881       | 23.051                       | 23.331       |                                  |

|          |                                                |
|----------|------------------------------------------------|
| OP-8     | Octagon                                        |
| HPY-8    | Heptagonal pyramid                             |
| HBPY-8   | Hexagonal bipyramid                            |
| CU-8     | Cube                                           |
| SAPR-8   | Square antiprism                               |
| TDD-8    | Triangular dodecahedron                        |
| JGBF-8   | Johnson - Gyrobifastigium (J26)                |
| JETBPY-8 | Johnson - Elongated triangular bipyramid (J14) |
| JBTP-8   | Johnson - Biaugmented trigonal prism (J50)     |
| BTPR-8   | Biaugmented trigonal prism                     |
| JSD-8    | Snub disphenoid (J84)                          |
| TT-8     | Triakis tetrahedron                            |
| ETBPY-8  | Elongated trigonal bipyramid (see 8)           |

**Table S4.** Crystal Data and Structure Parameters for compound **1·3H<sub>2</sub>O\_re**.

| Complex                                                                                                                                                                                                                                                                    | 1·3H <sub>2</sub> O_re                                                          |
|----------------------------------------------------------------------------------------------------------------------------------------------------------------------------------------------------------------------------------------------------------------------------|---------------------------------------------------------------------------------|
| formula                                                                                                                                                                                                                                                                    | C <sub>18</sub> H <sub>22</sub> DyN <sub>2</sub> O <sub>14</sub> S <sub>2</sub> |
| formula weight                                                                                                                                                                                                                                                             | 716.99                                                                          |
| temperature/K                                                                                                                                                                                                                                                              | 293                                                                             |
| crystal system                                                                                                                                                                                                                                                             | monoclinic                                                                      |
| space group                                                                                                                                                                                                                                                                | <i>P2<sub>1</sub>/n</i>                                                         |
| a/Å                                                                                                                                                                                                                                                                        | 8.6606(7)                                                                       |
| b/Å                                                                                                                                                                                                                                                                        | 14.3467(10)                                                                     |
| c/Å                                                                                                                                                                                                                                                                        | 18.6998(12)                                                                     |
| α/°                                                                                                                                                                                                                                                                        | 90                                                                              |
| β/°                                                                                                                                                                                                                                                                        | 92.713(3)                                                                       |
| γ/°                                                                                                                                                                                                                                                                        | 90                                                                              |
| Volume/Å <sup>3</sup>                                                                                                                                                                                                                                                      | 2320.9(3)                                                                       |
| Z                                                                                                                                                                                                                                                                          | 4                                                                               |
| ρ <sub>calc</sub> /cm <sup>3</sup>                                                                                                                                                                                                                                         | 2.052                                                                           |
| μ/mm <sup>-1</sup>                                                                                                                                                                                                                                                         | 3.478                                                                           |
| F(000)                                                                                                                                                                                                                                                                     | 1416.0                                                                          |
| R <sub>int</sub> / R <sub>sigma</sub>                                                                                                                                                                                                                                      | 0.0875 / 0.0294                                                                 |
| Goodness-of-fit on F <sup>2</sup>                                                                                                                                                                                                                                          | 1.132                                                                           |
| R <sub>1</sub> <sup>a</sup> / wR <sub>2</sub> <sup>b</sup> (I > 2σ(I) )                                                                                                                                                                                                    | 0.0372 / 0.0724                                                                 |
| R <sub>1</sub> / wR <sub>2</sub> (all data)                                                                                                                                                                                                                                | 0.0532 / 0.0789                                                                 |
| Max/min [e Å <sup>-3</sup> ]                                                                                                                                                                                                                                               | 1.39 / -1.70                                                                    |
| <sup>a</sup> R <sub>1</sub> = ∑  F <sub>o</sub>   -  F <sub>c</sub>   /∑ F <sub>o</sub>   <sup>b</sup> wR <sub>2</sub> = {∑[w(F <sub>o</sub> <sup>2</sup> - F <sub>c</sub> <sup>2</sup> ) <sup>2</sup> ]/ ∑[w(F <sub>o</sub> <sup>2</sup> ) <sup>2</sup> ]} <sup>1/2</sup> |                                                                                 |

**Table S5.** Selected bond lengths (Å) and angles [°] for **1**·3H<sub>2</sub>O\_re.

| Parameter               | Value / Å, ° |
|-------------------------|--------------|
| <i>T</i> / K            | <b>300</b>   |
| Dy1-O4                  | 2.233(4)     |
| Dy1-O5                  | 2.490(4)     |
| Dy1-O6                  | 2.279(3)     |
| Dy1-O7                  | 2.366(4)     |
| Dy1-O8                  | 2.372(4)     |
| Dy1-O10 <sup>1</sup>    | 2.407(4)     |
| Dy1-O13 <sup>2</sup>    | 2.323(4)     |
| Dy-O <sub>average</sub> | 2.353        |
| Dy1-N2                  | 2.544(4)     |
| O4-Dy1-O5               | 77.28(14)    |
| O4-Dy1-O6               | 90.00(14)    |
| O4-Dy1-O7               | 108.24(17)   |
| O4-Dy1-O8               | 75.24(15)    |
| O4-Dy1-O10 <sup>1</sup> | 75.58(14)    |
| O4-Dy1-O13 <sup>2</sup> | 146.11(15)   |
| O5-Dy1-N2               | 119.87(14)   |
| O7-Dy1-O5               | 142.99(14)   |
| O7-Dy1-O10 <sup>1</sup> | 73.61(15)    |
| O7-Dy1-N2               | 79.65(15)    |
| O6-Dy1-N2               | 66.79(13)    |
| O8-Dy1-O5               | 140.59(15)   |
| O8-Dy1-O7               | 73.42(16)    |

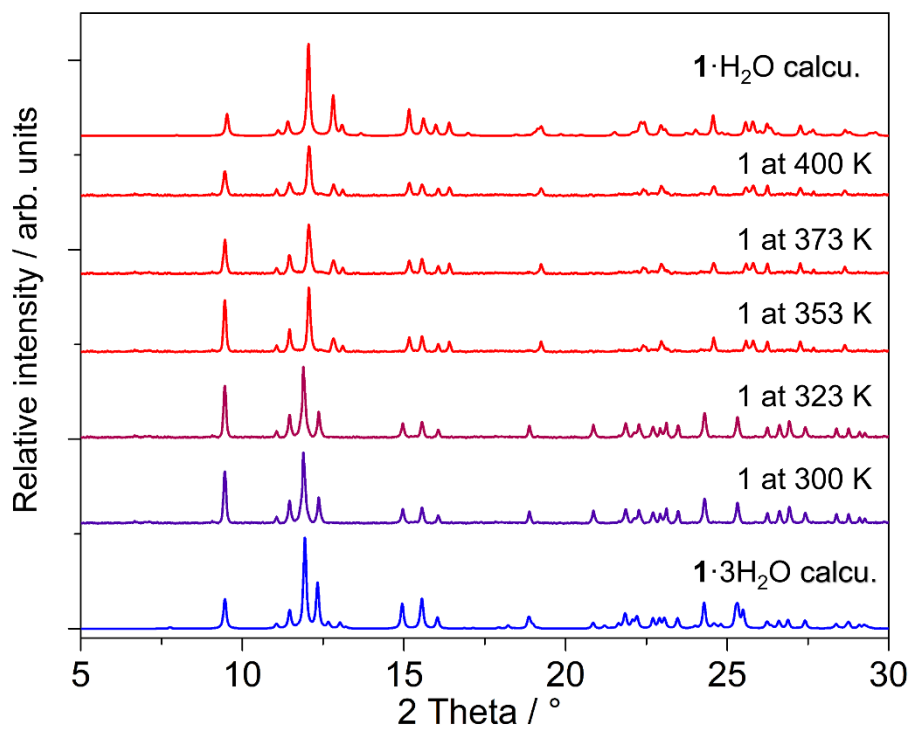

**Figure S4.** Temperature dependence of the powder X-ray diffraction (PXRD) patterns for  $1 \cdot 3\text{H}_2\text{O}$ . The respective simulated PXRD patterns of  $1 \cdot 3\text{H}_2\text{O}$  and  $1 \cdot \text{H}_2\text{O}$  were calculated on the basis of the single-crystal data via Mercury.

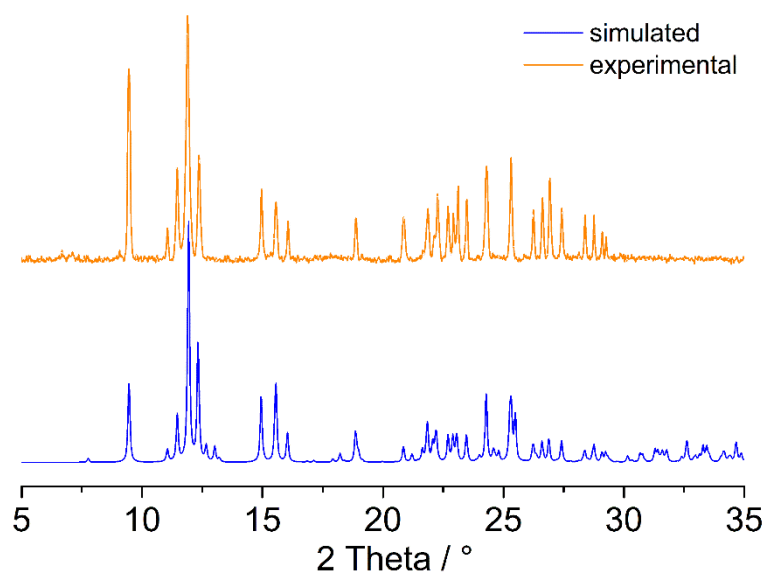

**Figure S5.** The experimental PXRD for rehydrated crystal sample of  $1 \cdot 3\text{H}_2\text{O}_{\text{re}}$ .



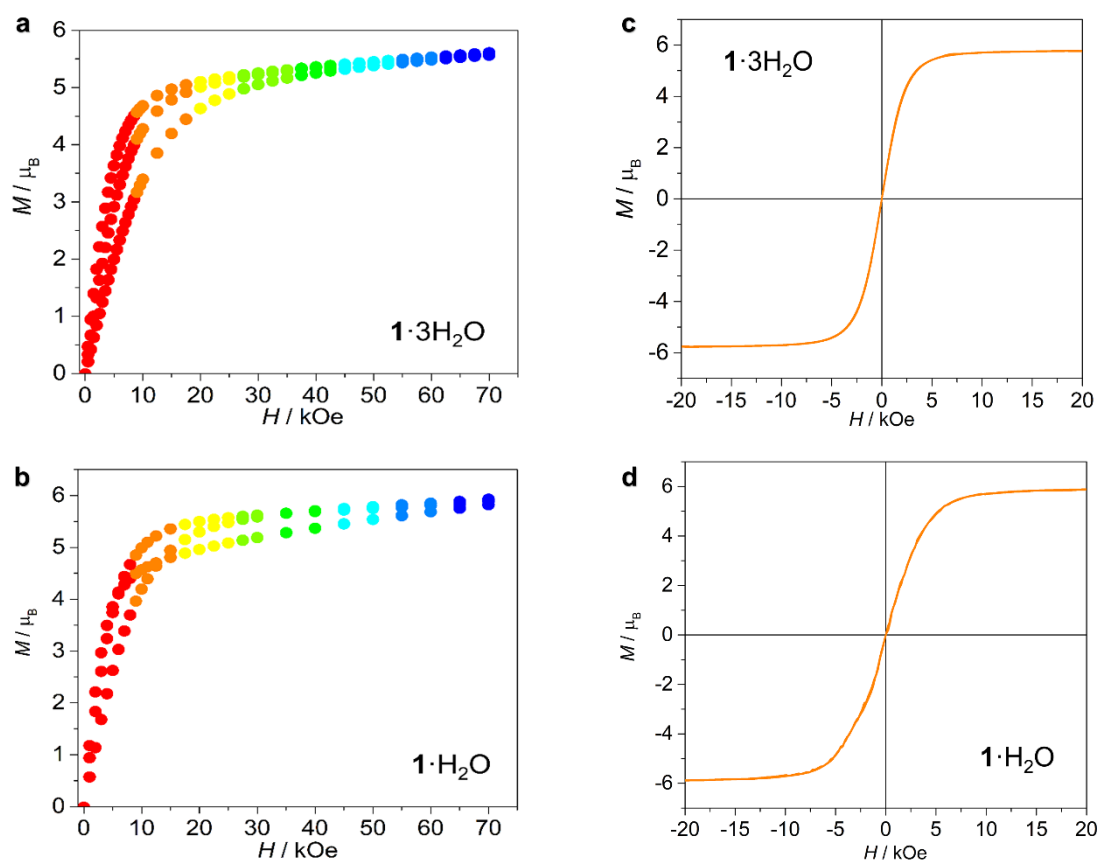

**Figure S6.** Magnetization versus applied magnetic fields curves for  $1 \cdot 3\text{H}_2\text{O}$  (a) and  $1 \cdot \text{H}_2\text{O}$  (b) collected at 2, 3, and 5 K. Magnetization versus field hysteresis measurements for  $1 \cdot 3\text{H}_2\text{O}$  (c) and  $1 \cdot \text{H}_2\text{O}$  (d) collected at 1.8 K with a field sweep rate of  $0.03 \text{ T s}^{-1}$ .

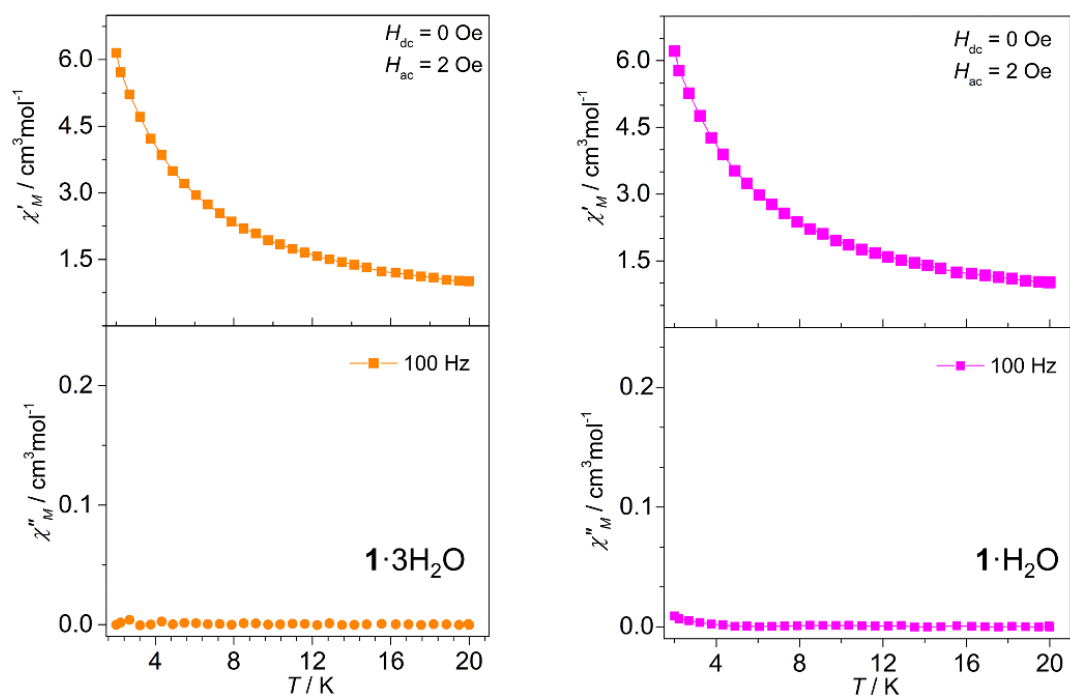

**Figure S7.** Temperature dependence of the in-phase ( $\chi'$ ) and out-of-phase ( $\chi''$ ) ac susceptibilities measured under zero dc field using a 100 Hz frequency for  $1 \cdot 3\text{H}_2\text{O}$  (left) and  $1 \cdot \text{H}_2\text{O}$  (right).

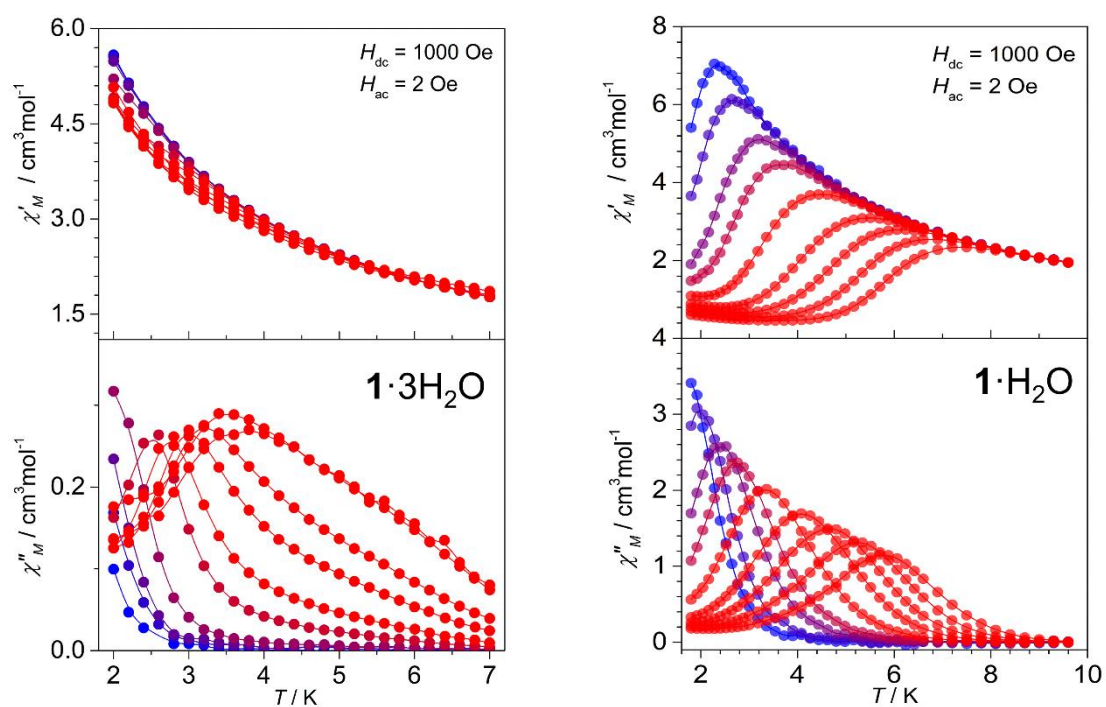

**Figure S8.** Temperature dependence of the in-phase ( $\chi'$ ) and out-of-phase ( $\chi''$ ) part of the ac susceptibilities measured under 1 kOe dc field for  $1 \cdot 3\text{H}_2\text{O}$  (left) and  $1 \cdot \text{H}_2\text{O}$  (right).

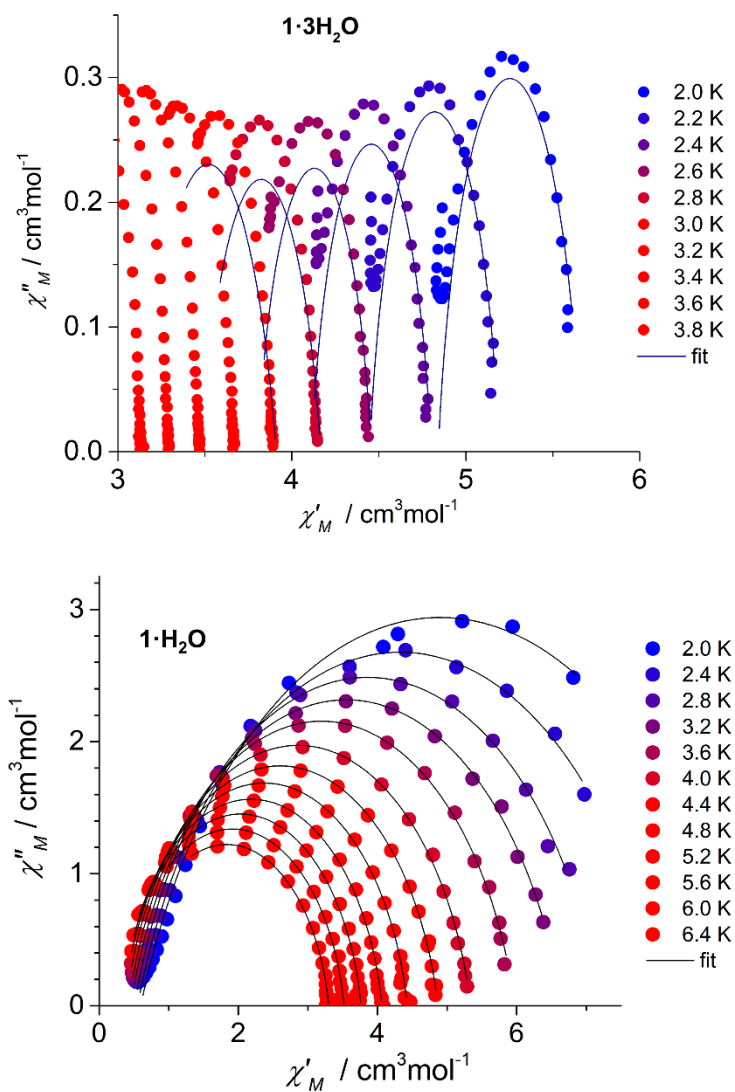

**Figure S9.** Cole-Cole plots for  $1 \cdot 3\text{H}_2\text{O}$  (up) and  $1 \cdot \text{H}_2\text{O}$  (down) under 1 kOe dc field.

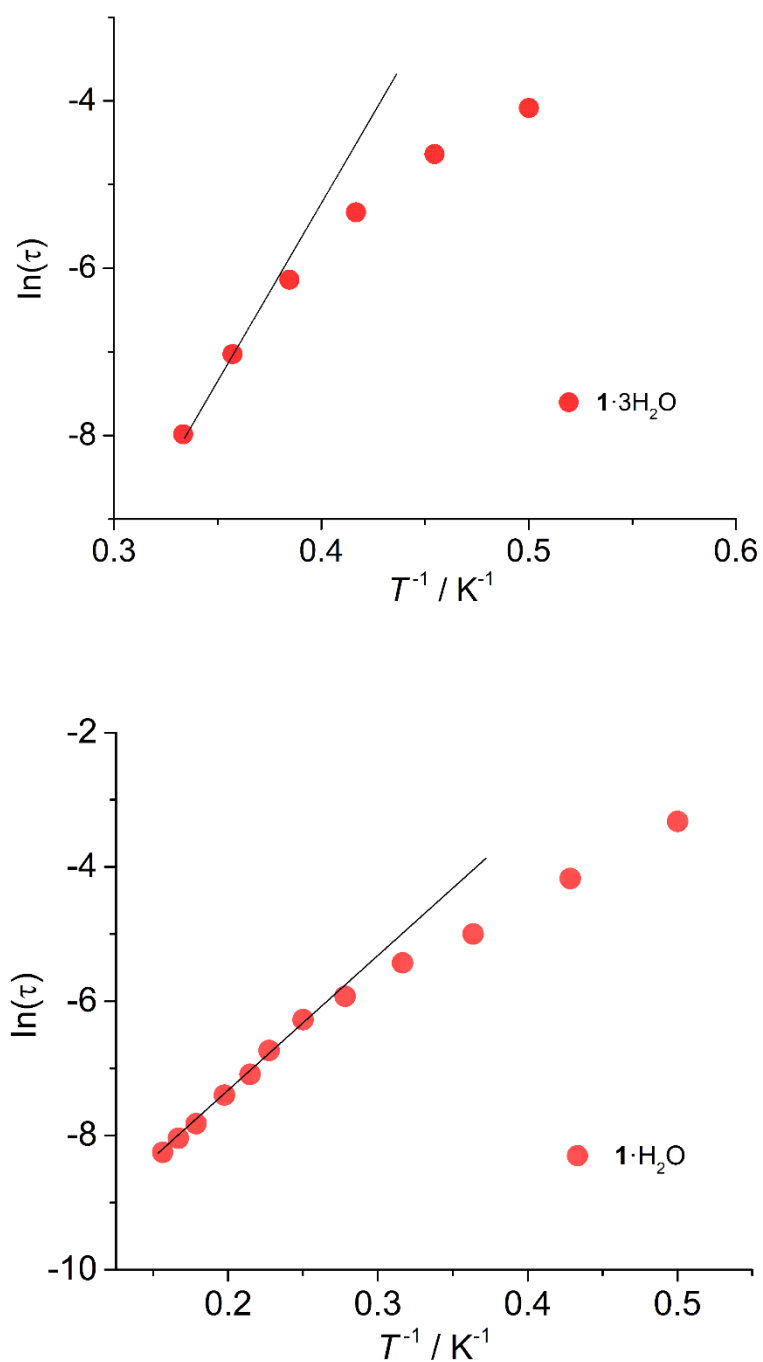

**Figure S10.** Natural logarithm of the relaxation time as a function of temperature for 1·3H<sub>2</sub>O (up) and 1·H<sub>2</sub>O (down). The black straight line represents the fit via the Orbach process.

**Table S6.** Relaxation fitting parameters from the least-square fitting of the Cole-Cole plots of  $\mathbf{1} \cdot 3\text{H}_2\text{O}$  under 1 kOe dc filed according to the generalized Debye model.

| T / K   | $\tau$ / s | $\chi_S$ / $\text{cm}^3\text{mol}^{-1}\text{K}$ | $\chi_T$ / $\text{cm}^3\text{mol}^{-1}\text{K}$ | $\alpha$ |
|---------|------------|-------------------------------------------------|-------------------------------------------------|----------|
| 1.99992 | 0.0168     | 4.84107                                         | 5.66499                                         | 0.20011  |
| 2.19998 | 0.00969    | 4.44761                                         | 5.19439                                         | 0.19736  |
| 2.39999 | 0.00483    | 4.11363                                         | 4.80098                                         | 0.20786  |
| 2.59996 | 0.00216    | 3.80259                                         | 4.45673                                         | 0.22694  |
| 2.80009 | 8.86118E-4 | 3.48146                                         | 4.16673                                         | 0.2776   |
| 2.99989 | 3.39651E-4 | 3.13061                                         | 3.91111                                         | 0.32131  |

**Table S7.** Relaxation fitting parameters from the least-square fitting of the Cole-Cole plots of  $\mathbf{1} \cdot \text{H}_2\text{O}$  under 1 kOe dc filed according to the generalized Debye model.

| T / K   | $\tau$ / s | $\chi_S$ / $\text{cm}^3\text{mol}^{-1}\text{K}$ | $\chi_T$ / $\text{cm}^3\text{mol}^{-1}\text{K}$ | $\alpha$ |
|---------|------------|-------------------------------------------------|-------------------------------------------------|----------|
| 1.99993 | 0.03602    | 0.6503                                          | 9.83789                                         | 0.24958  |
| 2.39996 | 0.0154     | 0.57885                                         | 8.55246                                         | 0.22381  |
| 2.79997 | 0.00673    | 0.52201                                         | 7.63228                                         | 0.20474  |
| 3.19974 | 0.00439    | 0.47459                                         | 6.94289                                         | 0.18905  |
| 3.59014 | 0.00267    | 0.43779                                         | 6.30616                                         | 0.1707   |
| 4.00099 | 0.00188    | 0.40479                                         | 5.60678                                         | 0.14611  |
| 4.39996 | 0.00119    | 0.35093                                         | 5.06421                                         | 0.14243  |
| 4.80009 | 8.32987E-4 | 0.32515                                         | 4.62531                                         | 0.1312   |
| 5.19986 | 6.11578E-4 | 0.30698                                         | 4.24401                                         | 0.12207  |
| 5.59804 | 3.9991E-4  | 0.29592                                         | 3.91975                                         | 0.1168   |
| 5.99938 | 3.21663E-4 | 0.29625                                         | 3.64638                                         | 0.11619  |
| 6.40003 | 2.6098E-4  | 0.32692                                         | 3.40975                                         | 0.11716  |

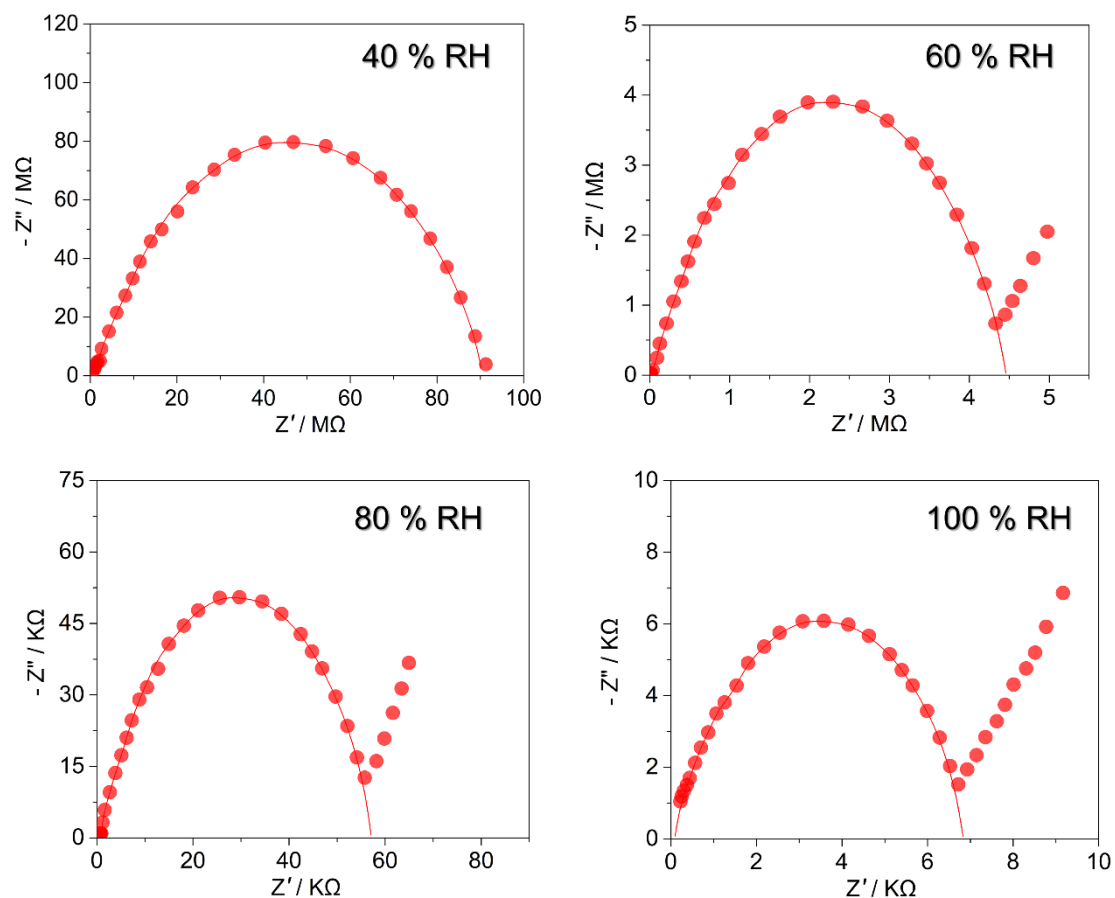

**Figure S11.** Nyquist plots of  $1 \cdot 3\text{H}_2\text{O}$  measured at  $25\text{ }^\circ\text{C}$  under different relative humidity in the 40-100% range. Solid red lines represent fitted semicircles, and the extracted values of conductivity were listed in Table S8.

**Table S8.** The conductivity of  $1 \cdot 3\text{H}_2\text{O}$  extracted from impedance spectra gathered at  $25\text{ }^\circ\text{C}$  under variable indicated relative humidity.

| RH% | $\sigma / \text{S cm}^{-1}$ |
|-----|-----------------------------|
| 40  | $2.1 \times 10^{-9}$        |
| 60  | $3.5 \times 10^{-7}$        |
| 80  | $1.7 \times 10^{-5}$        |
| 100 | $1.1 \times 10^{-4}$        |

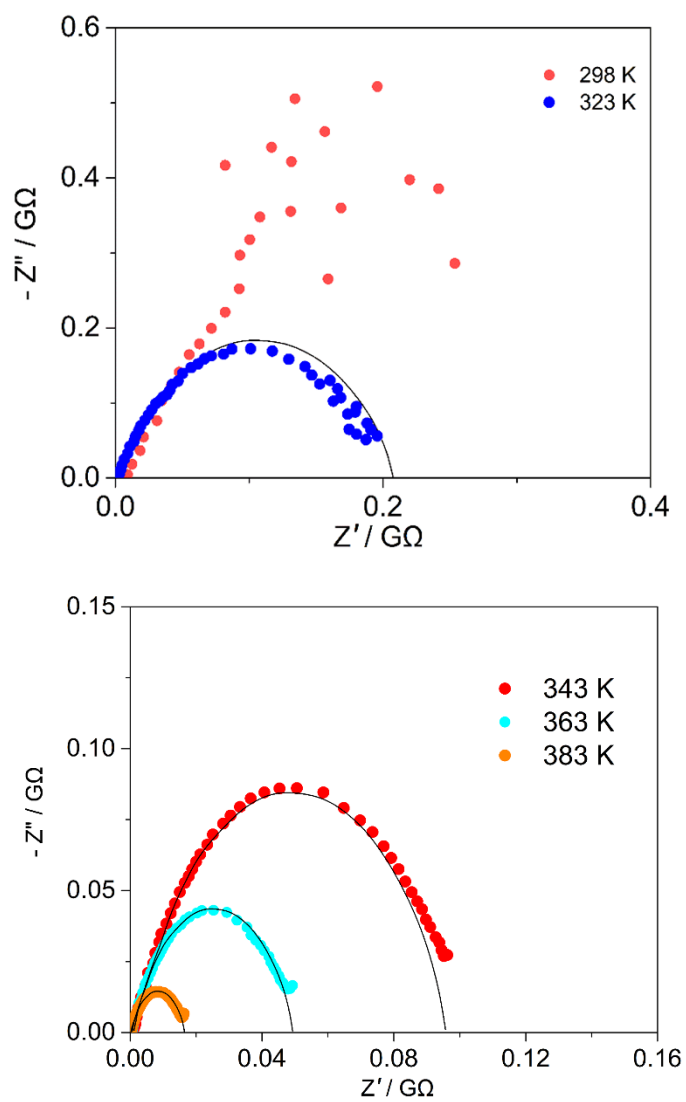

**Figure S12.** Nyquist plots of  $1 \cdot \text{H}_2\text{O}$  measured at different temperature (298 – 383 K) under 40% relative humidity. Solid red lines represent fitted semicircles.



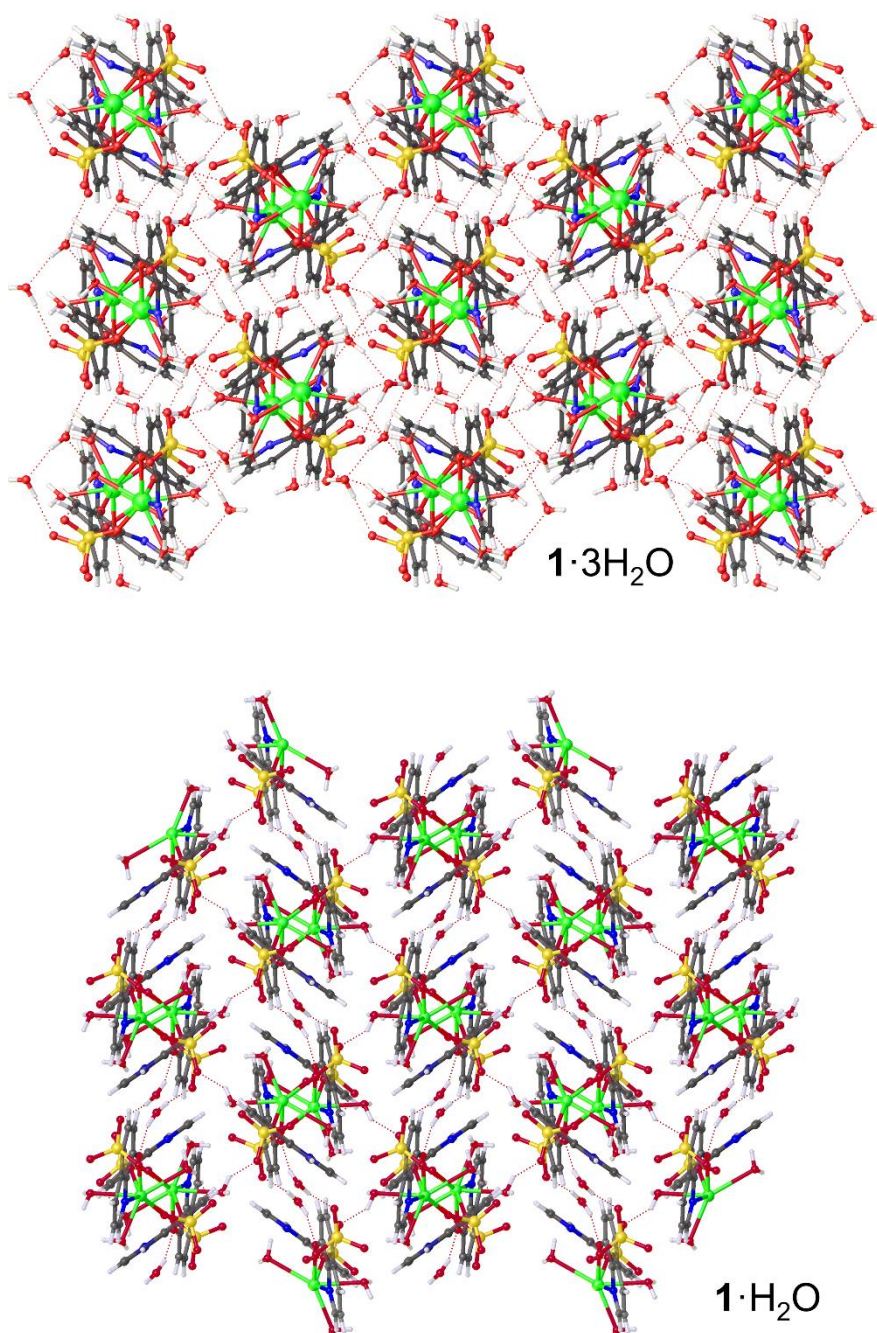

**Figure S13.** Hydrogen-bonded supramolecular 3D structures of 1·3H<sub>2</sub>O (up) and 1·H<sub>2</sub>O (down).

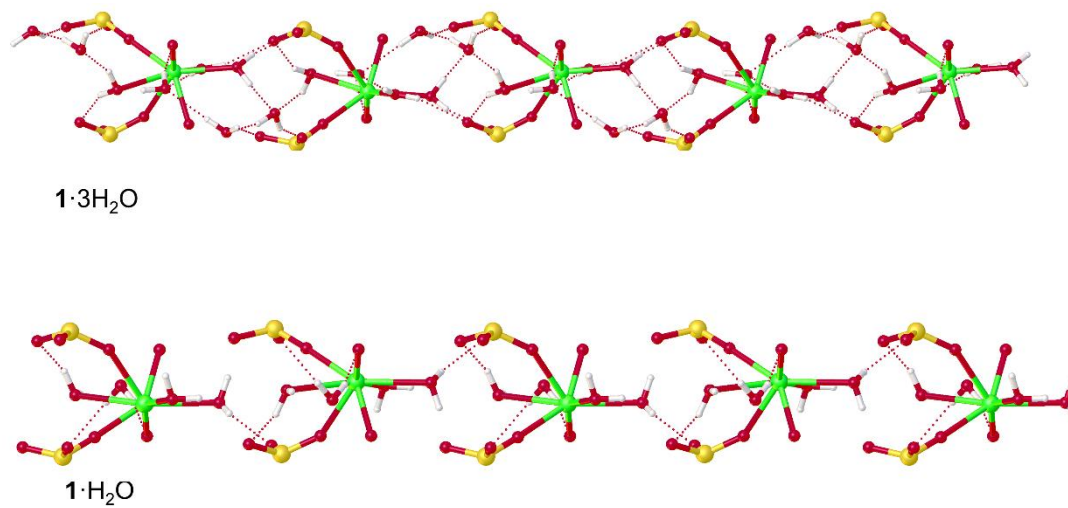

**Figure S14.** 1D hydrogen-bonded H<sub>2</sub>O chains in **1**·3H<sub>2</sub>O (up) and **1**·H<sub>2</sub>O (down) along *b* axis direction.

## Computational Details

All the DFT calculations were performed using ORCA 4.2.1 code.<sup>S5</sup> The position of hydrogens was optimized for the prepared model using BP86 level of theory and SV basis set for all atoms. Dispersion corrections have been taken care of by incorporating Grimme's atom-pairwise dispersion correction approach as implemented in ORCA.<sup>S6,S7,S8</sup>

All the multireference calculations were performed on the model of  $\mathbf{1} \cdot 3\text{H}_2\text{O}$  and  $\mathbf{1} \cdot \text{H}_2\text{O}$  using Open MOLCAS code.<sup>S9,S10</sup> The spin-Hamiltonian parameters were calculated using a complete active space self-consistent field (CASSCF) method.<sup>S11</sup> Here, we have employed the ANO-RCC-VDZP type basis set for the paramagnetic ion  $\text{Dy}^{\text{III}}$ , while the ANO-RCC-VDZ type basis set was used for the rest of the atoms.<sup>S12,S13</sup> The details of the basis set and contraction scheme are provided in the Table S15. To speed up the calculations, the two-electron integrals were computed using the resolution of identity Cholesky decomposition (RICD) approximation. For CASSCF calculations, the active space comprises CAS(9,7). Using this active spaces, we have computed 21 sextets for  $\text{Dy}^{\text{III}}$  ions in both  $\mathbf{1} \cdot 3\text{H}_2\text{O}$  and  $\mathbf{1} \cdot \text{H}_2\text{O}$ . Subsequently, these states were mixed in the spin-orbit restricted active space state interaction (SO-RASSI) module to compute the spin-orbit states.<sup>S14</sup> The calculated spin-free energies and SOC states for  $\mathbf{1} \cdot 3\text{H}_2\text{O}$  and  $\mathbf{1} \cdot \text{H}_2\text{O}$  are reported in Tables S9 and S10. The computed spin-orbit coupled (SOC) states were used to calculate the  $g$ -values, crystal field parameters, transition magnetic moments, magnetic susceptibility, and magnetization of  $\text{Dy}^{\text{III}}$  with the SINGLE\_ANISO module<sup>S15</sup> as implemented in MOLCAS.

**Table S9.** RASSI-SO computed low-lying 21 spin-free sextet states and the spin-orbit coupled (Kramer doublets) for Dy in complex **1·3H<sub>2</sub>O** at 300K. All the values are reported here in cm<sup>-1</sup>.

| Complex <b>1·3H<sub>2</sub>O</b> |                   |         |
|----------------------------------|-------------------|---------|
| SPIN-FREE STATES                 | SPIN-ORBIT STATES |         |
| 0.0                              | 0.0               | 9862.8  |
| 14.9                             | 157.5             | 9937.3  |
| 205.7                            | 235.7             | 10012.6 |
| 238.6                            | 303.5             | 11099.0 |
| 305.6                            | 335.1             | 11291.7 |
| 367.2                            | 407.7             | 11430.0 |
| 402.7                            | 478.3             | 11881.6 |
| 484.7                            | 608.7             | 11909.0 |
| 531.2                            | 3075.7            | 11938.9 |
| 653.7                            | 3190.2            | 11955.6 |
| 666.1                            | 3264.7            | 11990.7 |
| 7642.5                           | 3323.7            | 13673.1 |
| 7665.2                           | 3368.2            | 13696.3 |
| 7760.9                           | 3417.1            | 13756.4 |
| 7790.9                           | 3489.5            | 13769.4 |
| 7823.4                           | 5707.7            | 15087.6 |
| 7887.3                           | 5805.3            | 15112.4 |
| 7905.2                           | 5888.6            | 15149.3 |
| 34622.9                          | 5931.4            | 16108.6 |
| 35103.1                          | 5973.7            | 16121.0 |
| 35210.8                          | 6043.0            | 16714.3 |
|                                  | 7925.6            | 38764.6 |
|                                  | 8017.8            | 38814.7 |
|                                  | 8099.6            | 38905.6 |
|                                  | 8140.3            | 39105.4 |
|                                  | 8215.0            | 40164.1 |
|                                  | 9653.4            | 40363.2 |
|                                  | 9672.7            | 40494.7 |
|                                  | 9700.7            | 41311.3 |
|                                  | 9734.8            | 41383.5 |
|                                  | 9756.4            |         |
|                                  | 9779.1            |         |
|                                  | 9816.5            |         |

**Table S10.** RASSI-SO computed low-lying 21 spin-free sextet states and the spin-orbit coupled (Kramer doublets) for Dy in complex **1**·H<sub>2</sub>O at 400K. All the values are reported here in cm<sup>-1</sup>.

| Complex <b>1</b> ·H <sub>2</sub> O |                   |         |
|------------------------------------|-------------------|---------|
| SPIN-FREE STATES                   | SPIN-ORBIT STATES |         |
| 0.0                                | 0.0               | 9810.8  |
| 25.0                               | 140.2             | 9871.5  |
| 170.8                              | 184.8             | 9961.4  |
| 241.0                              | 245.5             | 11085.1 |
| 291.3                              | 297.7             | 11225.4 |
| 339.9                              | 342.0             | 11373.0 |
| 366.8                              | 423.0             | 11838.6 |
| 447.2                              | 549.0             | 11871.4 |
| 464.3                              | 3082.8            | 11883.8 |
| 620.1                              | 3169.0            | 11906.6 |
| 628.7                              | 3212.7            | 11939.6 |
| 7598.2                             | 3254.9            | 13623.4 |
| 7638.0                             | 3313.8            | 13647.1 |
| 7754.2                             | 3358.8            | 13707.2 |
| 7783.5                             | 3431.6            | 13728.0 |
| 7798.1                             | 5717.8            | 15035.4 |
| 7847.0                             | 5769.5            | 15062.8 |
| 7860.7                             | 5820.7            | 15107.0 |
| 34710.0                            | 5864.3            | 16060.3 |
| 34921.7                            | 5917.3            | 16073.8 |
| 35202.8                            | 5995.5            | 16664.2 |
|                                    | 7927.7            | 38736.7 |
|                                    | 7967.7            | 38818.8 |
|                                    | 8024.9            | 38883.0 |
|                                    | 8083.9            | 38988.3 |
|                                    | 8171.0            | 40136.0 |
|                                    | 9608.6            | 40258.3 |
|                                    | 9639.6            | 40437.9 |
|                                    | 9670.1            | 41257.0 |
|                                    | 9689.6            | 41311.5 |
|                                    | 9718.2            |         |
|                                    | 9743.0            |         |
|                                    | 9752.8            |         |

**Table S11.** SINGLE\_ANISO computed g-tensors, the angle of deviation from ground state  $g_{zz}$  orientation and relative energies of eight low lying Kramers doublets for  $1 \cdot 3H_2O$  and  $1 \cdot H_2O$ .

| Complex $1 \cdot 3H_2O$  |          |          |          |                            | Complex $1 \cdot H_2O$   |          |          |          |                            |
|--------------------------|----------|----------|----------|----------------------------|--------------------------|----------|----------|----------|----------------------------|
| KDs Energy ( $cm^{-1}$ ) | $g_{xx}$ | $g_{yy}$ | $g_{zz}$ | $\theta$ ( $^\circ$ angle) | KDs Energy ( $cm^{-1}$ ) | $g_{xx}$ | $g_{yy}$ | $g_{zz}$ | $\theta$ ( $^\circ$ angle) |
| 0.0                      | 0.0142   | 0.0179   | 19.7880  | 0.0                        | 0.0                      | 0.0303   | 0.0542   | 19.6981  | 0.0                        |
| 157.5                    | 0.0833   | 0.1271   | 17.4577  | 160.0                      | 140.2                    | 1.6394   | 4.3021   | 13.9906  | 136.4                      |
| 235.7                    | 0.2271   | 0.5059   | 15.0220  | 146.8                      | 184.8                    | 0.7015   | 4.7669   | 8.8613   | 37.3                       |
| 303.5                    | 3.3806   | 6.6750   | 10.4133  | 115.9                      | 245.5                    | 2.9874   | 5.8806   | 9.8383   | 100.7                      |
| 335.1                    | 1.0096   | 3.1108   | 9.5208   | 69.5                       | 297.7                    | 0.5022   | 2.2905   | 12.8331  | 92.1                       |
| 407.7                    | 1.8340   | 2.2233   | 14.4210  | 71.5                       | 342.0                    | 0.8073   | 1.3927   | 16.1265  | 107.6                      |
| 478.3                    | 0.3474   | 0.6198   | 18.4471  | 75.0                       | 423.0                    | 0.0209   | 0.0587   | 18.0133  | 81.8                       |
| 608.7                    | 0.0265   | 0.0508   | 19.6533  | 65.5                       | 549.0                    | 0.0011   | 0.0040   | 19.4819  | 58.2                       |

**Table S12.** SINGLE\_ANISO computed crystal field parameters for  $1 \cdot 3H_2O$  and  $1 \cdot H_2O$ .

| k | q         | $B_k^q$                 |                        |
|---|-----------|-------------------------|------------------------|
|   |           | Complex $1 \cdot 3H_2O$ | Complex $1 \cdot H_2O$ |
| 2 | -2        | -1.21E+00               | 3.26E+00               |
|   | -1        | 4.05E+00                | -7.19E+00              |
|   | 0         | -5.30E+00               | -3.31E+00              |
|   | 1         | -1.10E+01               | -6.39E+00              |
|   | 2         | 4.63E-01                | -3.53E+00              |
| 4 | -4        | 4.92E-02                | 3.56E-02               |
|   | -3        | 1.64E-01                | -2.95E-01              |
|   | -2        | -4.08E-02               | 1.39E-01               |
|   | -1        | -4.72E-02               | 2.14E-02               |
|   | 0         | -2.82E-02               | -3.07E-02              |
|   | 1         | 1.34E-01                | -1.69E-01              |
|   | 2         | -7.57E-02               | 7.76E-02               |
|   | 3         | 4.12E-01                | 1.11E-01               |
| 4 | -7.45E-02 | -5.40E-02               |                        |

|   |    |           |           |
|---|----|-----------|-----------|
| 6 | -6 | -4.28E-04 | 6.33E-04  |
|   | -5 | -3.90E-03 | -5.62E-03 |
|   | -4 | 2.61E-03  | 2.07E-03  |
|   | -3 | 4.30E-03  | -9.11E-03 |
|   | -2 | 3.02E-03  | -7.67E-04 |
|   | -1 | 1.69E-03  | -7.90E-04 |
|   | 0  | -2.94E-05 | -1.11E-04 |
|   | 1  | 1.46E-03  | 2.04E-03  |
|   | 2  | 3.14E-03  | -2.48E-04 |
|   | 3  | 3.23E-03  | 5.13E-03  |
|   | 4  | -4.29E-03 | -3.47E-03 |
|   | 5  | 2.21E-03  | -4.19E-03 |
|   | 6  | 3.03E-03  | -2.32E-03 |

**Table S13.** SINGLE\_ANISO computed wave function decomposition analysis for Dy centre in complex 1·3H<sub>2</sub>O. The major dominating values are kept in bold.

| $\pm mJ$ | <i>wave function decomposition analysis of complex 1</i>                                                                                                              |
|----------|-----------------------------------------------------------------------------------------------------------------------------------------------------------------------|
| KD1      | <b>97.7%</b> $ \pm 15/2\rangle + 1.0\%$ $ \pm 9/2\rangle + 0.7\%$ $ \pm 7/2\rangle$                                                                                   |
| KD2      | <b>81.7%</b> $ \pm 13/2\rangle + 11.5\%$ $ \pm 11/2\rangle + 3.5\%$ $ \pm 9/2\rangle + 2.1\%$ $ \pm 5/2\rangle$                                                       |
| KD3      | <b>35.0%</b> $ \pm 11/2\rangle + 29.2\%$ $ \pm 9/2\rangle + 21.8\%$ $ \pm 7/2\rangle + 9.4\%$ $ \pm 13/2\rangle + 1.4\%$ $ \pm 15/2\rangle$                           |
| KD4      | <b>38.0%</b> $ \pm 5/2\rangle + 20.3\%$ $ \pm 7/2\rangle + 16.3\%$ $ \pm 11/2\rangle + 12.2\%$ $ \pm 1/2\rangle + 7.7\%$ $ \pm 3/2\rangle + 4.2\%$ $ \pm 13/2\rangle$ |
| KD5      | <b>37.6%</b> $ \pm 3/2\rangle + 18.7\%$ $ \pm 11/2\rangle + 14.3\%$ $ \pm 9/2\rangle + 12.7\%$ $ \pm 1/2\rangle + 11.0\%$ $ \pm 5/2\rangle + 4.1\%$ $ \pm 7/2\rangle$ |
| KD6      | <b>33.3%</b> $ \pm 1/2\rangle + 25.6\%$ $ \pm 9/2\rangle + 14.9\%$ $ \pm 3/2\rangle + 10.0\%$ $ \pm 11/2\rangle + 8.6\%$ $ \pm 7/2\rangle + 7.3\%$ $ \pm 5/2\rangle$  |
| KD7      | <b>36.0%</b> $ \pm 1/2\rangle + 21.1\%$ $ \pm 3/2\rangle + 19.4\%$ $ \pm 7/2\rangle + 12.7\%$ $ \pm 5/2\rangle + 9.5\%$ $ \pm 9/2\rangle$                             |
| KD8      | <b>27.7%</b> $ \pm 5/2\rangle + 24.4\%$ $ \pm 7/2\rangle + 17.5\%$ $ \pm 3/2\rangle + 15.2\%$ $ \pm 9/2\rangle + 7.5\%$ $ \pm 11/2\rangle + 5.4\%$ $ \pm 1/2\rangle$  |

**Table S14.** SINGLE\_ANISO computed wave function decomposition analysis for Dy centre in complex 1·H<sub>2</sub>O. The major dominating values are kept in bold.

| $\pm mJ$ | <i>wave function decomposition analysis of complex 2</i>                                                                                                              |
|----------|-----------------------------------------------------------------------------------------------------------------------------------------------------------------------|
| KD1      | <b>96.7%</b> $ \pm 15/2\rangle + 1.1\%$ $ \pm 9/2\rangle + 1.0\%$ $ \pm 11/2\rangle$                                                                                  |
| KD2      | <b>48.0%</b> $ \pm 13/2\rangle + 12.1\%$ $ \pm 3/2\rangle + 11.4\%$ $ \pm 1/2\rangle + 9.9\%$ $ \pm 5/2\rangle + 8.3\%$ $ \pm 9/2\rangle + 7.9\%$ $ \pm 7/2\rangle$   |
| KD3      | <b>37.6%</b> $ \pm 13/2\rangle + 18.5\%$ $ \pm 1/2\rangle + 14.0\%$ $ \pm 11/2\rangle + 12.1\%$ $ \pm 3/2\rangle + 8.6\%$ $ \pm 5/2\rangle + 6.5\%$ $ \pm 7/2\rangle$ |

|     |                                                                                                                                                       |
|-----|-------------------------------------------------------------------------------------------------------------------------------------------------------|
| KD4 | $35.0\%  \pm 11/2\rangle + 15.1\%  \pm 3/2\rangle + 12.7\%  \pm 7/2\rangle + 12.6\%  \pm 9/2\rangle + 12.6\%  \pm 5/2\rangle + 7.4\%  \pm 1/2\rangle$ |
| KD5 | $22.3\%  \pm 11/2\rangle + 22.1\%  \pm 9/2\rangle + 18.2\%  \pm 1/2\rangle + 14.3\%  \pm 5/2\rangle + 14.0\%  \pm 7/2\rangle + 7.9\%  \pm 3/2\rangle$ |
| KD6 | $26.6\%  \pm 7/2\rangle + 23.6\%  \pm 5/2\rangle + 22.8\%  \pm 9/2\rangle + 15.6\%  \pm 3/2\rangle + 6.9\%  \pm 11/2\rangle$                          |
| KD7 | $39.5\%  \pm 1/2\rangle + 29.3\%  \pm 3/2\rangle + 11.1\%  \pm 5/2\rangle + 8.7\%  \pm 9/2\rangle + 6.2\%  \pm 7/2\rangle$                            |
| KD8 | $25.7\%  \pm 7/2\rangle + 22.2\%  \pm 9/2\rangle + 19.6\%  \pm 5/2\rangle + 15.2\%  \pm 11/2\rangle + 8.0\%  \pm 3/2\rangle + 6.8\%  \pm 13/2\rangle$ |

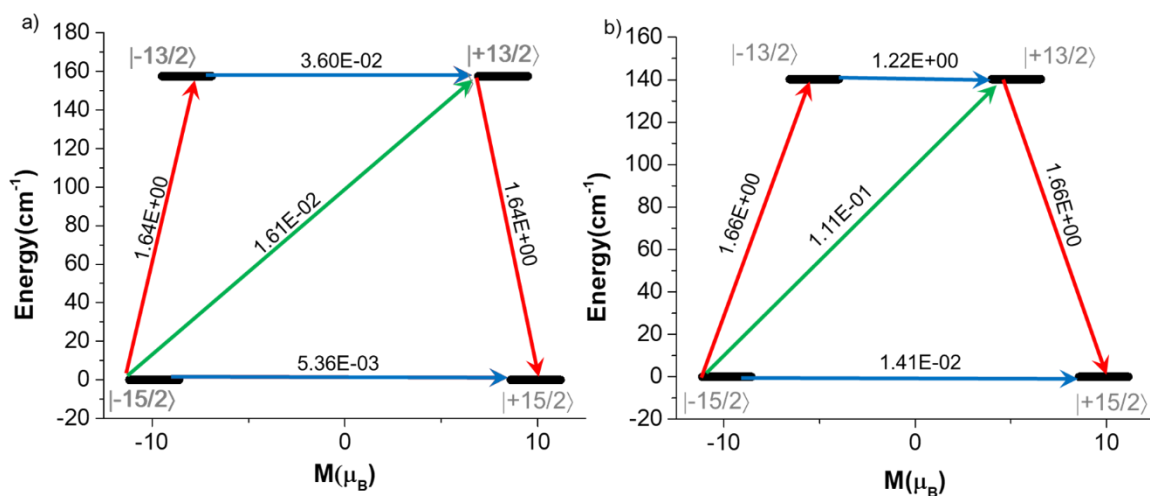

**Figure S15.** Ab initio computed magnetic relaxation pathway of the a)  $1 \cdot 3\text{H}_2\text{O}$  and b)  $1 \cdot \text{H}_2\text{O}$ . The grey line indicates the KDs as a function of magnetic moments. The blue, red and green lines represent thermal, QTM, and possible Orbach relaxations.



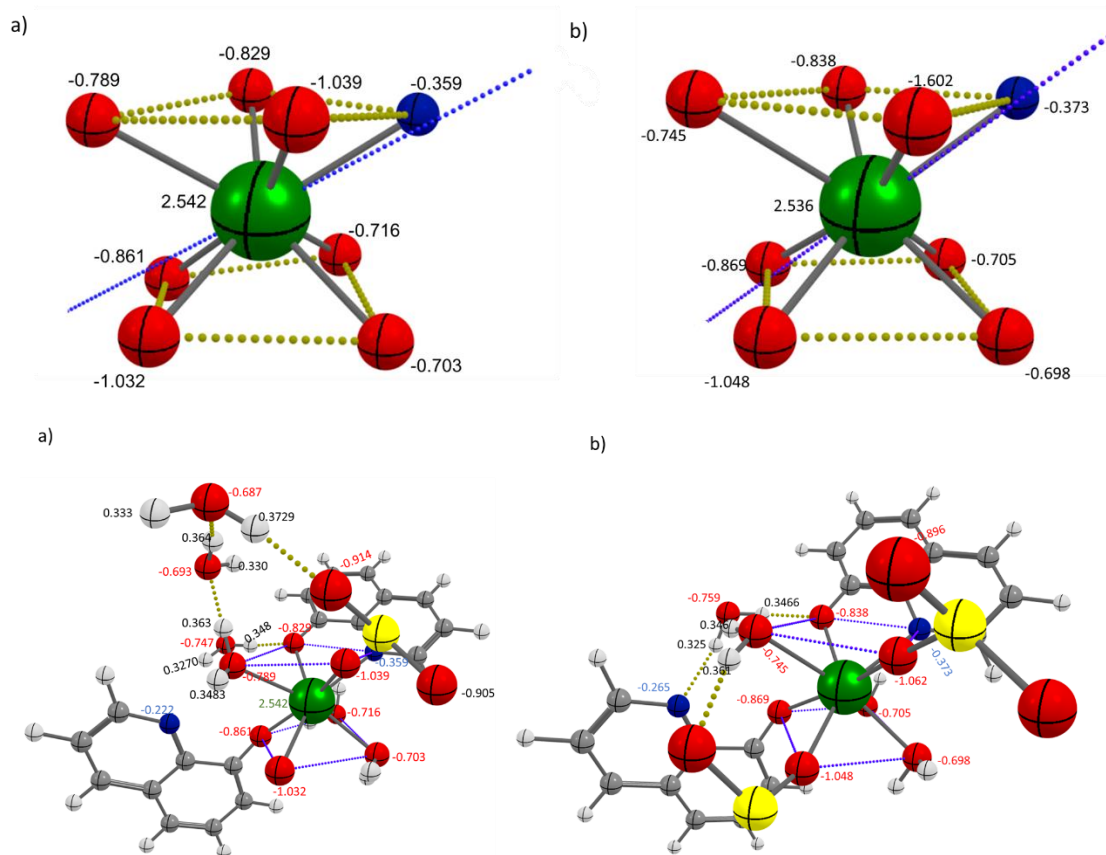

**Figure S16.** LoProp charge for the two Dy centers in a) Complex 1·3H<sub>2</sub>O and b) Complex 1·H<sub>2</sub>O. (in core as well as in the vicinity of neighboring water molecules) Color code: Dy (Green); N (blue), O (red), C (grey), H(white).

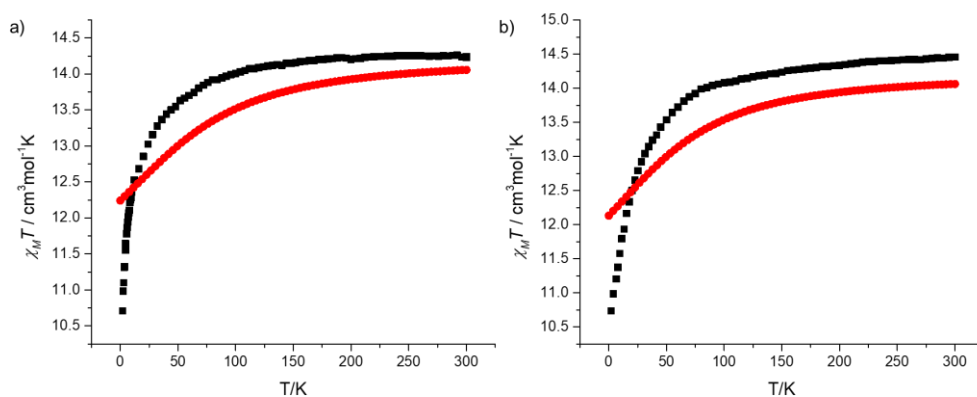

**Figure S17.** SINGLE\_ANISO fitting for  $\chi_M T$  vs  $T$  for a) Complex 1·3H<sub>2</sub>O and b) Complex 1·H<sub>2</sub>O. Red (calculated); black (experimental).

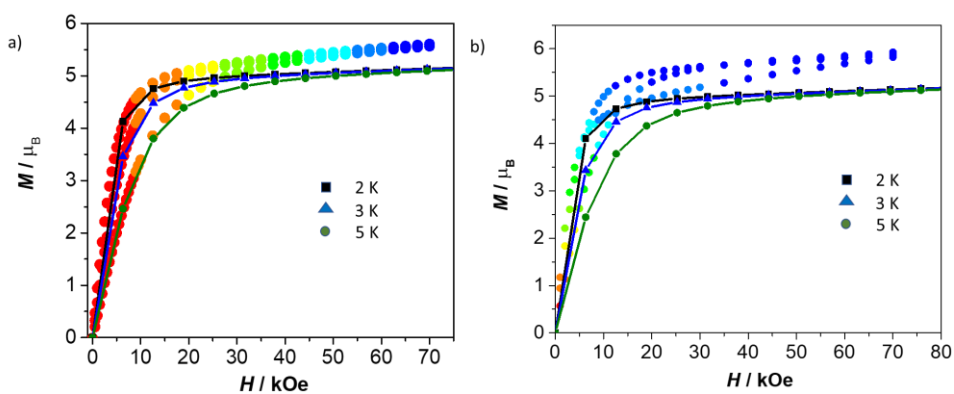

**Figure S18.** Experimental versus Calculated  $M$  vs  $H$  plot at different temperatures (2K, 3K, 5K) for a) Complex 1·3H<sub>2</sub>O and b) Complex 1·H<sub>2</sub>O.

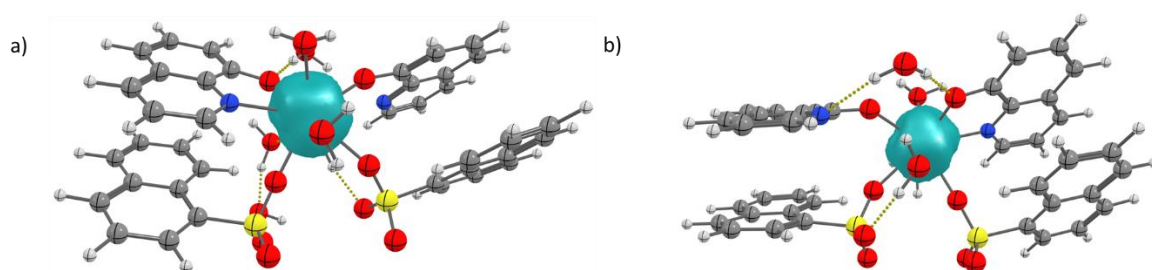

**Figure S19.** DFT calculated beta spin density plot for a) Complex 1·3H<sub>2</sub>O b) Complex 1·H<sub>2</sub>O at iso value  $0.000433 \text{ e}^-/\text{bohr}^3$ . Color code: N (blue), O (red), S (yellow), C (grey), H(white).

**Table S15.** Basis functions used in *ab initio* CASSCF calculations using OpenMolcas code.

| Atoms | ANO-RCC basis functions |
|-------|-------------------------|
| H     | 2s                      |
| C     | 3s2p                    |
| N, O  | 3s2p                    |
| Dy    | 7s6p4d2f1g.             |

**Table S16.** Hydrogen optimized coordinates for mononuclear model of  $1 \cdot 3\text{H}_2\text{O}$  and  $1 \cdot \text{H}_2\text{O}$ .

| Complex $1 \cdot 3\text{H}_2\text{O}$ |          |          |          |
|---------------------------------------|----------|----------|----------|
| Dy                                    | 0.00000  | 0.00000  | 0.00000  |
| S                                     | 1.62180  | -1.88957 | 2.77025  |
| S                                     | 1.12090  | 2.33416  | 2.75164  |
| O                                     | -0.53710 | -2.09181 | -0.55876 |
| O                                     | -1.40416 | -0.74229 | 1.91489  |
| O                                     | -2.15480 | 0.65326  | -0.36400 |
| O                                     | 2.24366  | 0.39401  | -0.66249 |
| O                                     | 0.00000  | 0.00000  | -2.37216 |
| O                                     | 1.37611  | -1.37104 | 1.42727  |
| O                                     | 0.61336  | 1.44096  | 1.71808  |
| O                                     | -4.07310 | -1.27016 | -0.32734 |
| O                                     | -3.58572 | 0.49337  | 2.84498  |
| O                                     | -2.15137 | 1.57832  | 4.85472  |
| O                                     | 0.57477  | -1.53028 | 3.71116  |
| O                                     | 2.95212  | -1.52739 | 3.22933  |
| O                                     | 0.49260  | 2.06291  | 4.02363  |
| O                                     | 2.56647  | 2.33420  | 2.80122  |
| N                                     | -1.94043 | -3.46484 | 1.25911  |
| N                                     | -0.18820 | 2.38219  | -0.86481 |
| C                                     | -0.42911 | -3.37921 | -0.57758 |
| C                                     | -2.12207 | -6.17952 | 1.27124  |
| C                                     | 0.58173  | 4.56075  | -1.46110 |
| C                                     | -1.22038 | -4.15827 | 0.33125  |
| C                                     | -3.79732 | 2.17504  | -1.16147 |

|   |          |          |          |
|---|----------|----------|----------|
| C | -3.14085 | 4.42788  | -1.79009 |
| C | -2.70900 | -4.04924 | 2.15981  |
| C | -1.77303 | 4.09992  | -1.55751 |
| C | -4.10703 | 3.47114  | -1.60673 |
| C | 0.79444  | 3.24480  | -1.04313 |
| C | 0.40078  | -4.10538 | -1.42272 |
| C | -1.46653 | 2.78651  | -1.11939 |
| C | -0.45142 | -6.24131 | -0.61994 |
| C | -1.27523 | -5.56751 | 0.32712  |
| C | -2.83783 | -5.42962 | 2.17082  |
| C | -0.69066 | 4.98816  | -1.70529 |
| C | 0.36493  | -5.50537 | -1.44004 |
| C | -2.49628 | 1.81353  | -0.87676 |
| C | 3.07627  | -6.42284 | 0.74374  |
| C | 1.56496  | -6.50848 | 2.58043  |
| C | 3.25791  | -3.70817 | 0.73161  |
| C | 2.35622  | -5.72942 | 1.67160  |
| C | 3.84484  | -5.83845 | -0.15696 |
| C | 0.73507  | -5.78231 | 3.42557  |
| C | 1.58726  | -3.64638 | 2.62279  |
| C | 2.41107  | -4.32018 | 1.67573  |
| C | 3.97367  | -4.45807 | -0.16797 |
| C | 0.77091  | -4.38232 | 3.44289  |
| C | -2.30511 | 6.01008  | 1.33304  |
| C | -3.07504 | 3.83151  | 1.92933  |
| C | 1.30400  | 6.21722  | 1.62971  |
| C | 0.64754  | 3.96439  | 2.25833  |
| C | -0.72028 | 4.29234  | 2.02574  |
| C | 1.61372  | 4.92112  | 2.07496  |
| C | -3.28775 | 5.14747  | 1.51137  |
| C | -1.02678 | 5.60575  | 1.58763  |
| C | -1.80265 | 3.40411  | 2.17353  |
| C | 0.00297  | 6.57873  | 1.34499  |
| H | -2.28366 | -0.29428 | 2.20140  |
| H | -0.79002 | -0.95651 | 2.69194  |
| H | 2.58492  | 0.10256  | 0.24616  |
| H | 2.43148  | -0.31710 | -1.33469 |
| H | -0.40963 | -0.93223 | -2.27258 |
| H | -0.72038 | 0.66488  | -2.55596 |
| H | -2.19655 | -7.28151 | 1.27580  |
| H | 1.44361  | 5.23725  | -1.55997 |
| H | -4.58781 | 1.42577  | -0.99357 |
| H | -3.24221 | -3.39161 | 2.87125  |
| H | -5.16520 | 3.72116  | -1.79610 |

|                            |          |          |          |
|----------------------------|----------|----------|----------|
| H                          | 1.80719  | 2.86701  | -0.82909 |
| H                          | 1.08382  | -3.55849 | -2.09367 |
| H                          | -3.49874 | -5.92572 | 2.90360  |
| H                          | -0.89225 | 6.02713  | -2.01716 |
| H                          | 1.03450  | -6.03349 | -2.14187 |
| H                          | -3.33764 | -0.57840 | -0.40656 |
| H                          | -3.65569 | -1.95630 | 0.26894  |
| H                          | -3.13437 | 1.07137  | 3.58055  |
| H                          | -3.92336 | 1.01889  | 2.07564  |
| H                          | -1.20351 | 1.84386  | 4.54736  |
| H                          | -2.02918 | 0.76633  | 5.41626  |
| H                          | 3.32773  | -2.61092 | 0.73060  |
| H                          | 4.40052  | -6.43992 | -0.89745 |
| H                          | 0.04604  | -6.29863 | 4.11508  |
| H                          | 4.62936  | -3.95982 | -0.90115 |
| H                          | 0.11180  | -3.82343 | 4.12781  |
| H                          | -3.92510 | 3.14487  | 2.05003  |
| H                          | 2.12907  | 6.93661  | 1.48604  |
| H                          | 2.65873  | 4.62715  | 2.27096  |
| H                          | -4.33045 | 5.45104  | 1.30709  |
| H                          | -1.62162 | 2.35292  | 2.43788  |
| H                          | -0.44873 | -7.34444 | -0.65586 |
| H                          | -3.39604 | 5.44996  | -2.11475 |
| H                          | -0.26958 | 7.58046  | 0.97802  |
| H                          | -2.49261 | 7.03659  | 0.97957  |
| H                          | 2.99084  | -7.52440 | 0.75098  |
| H                          | 1.57582  | -7.60688 | 2.53095  |
| Complex 1·H <sub>2</sub> O |          |          |          |
| Dy                         | 0.00000  | 0.00000  | 0.00000  |
| S                          | -2.15260 | -1.24684 | 2.78530  |
| S                          | -0.66970 | 2.59986  | 2.46540  |
| O                          | 1.68822  | -1.45913 | -0.16553 |
| O                          | 1.60397  | 1.44205  | -0.57850 |
| O                          | -2.16716 | 0.61961  | -0.79583 |
| O                          | 0.00000  | 0.00000  | -2.44180 |
| O                          | 1.42817  | 0.00000  | 2.18657  |
| O                          | -0.53481 | 1.94871  | 1.18656  |
| O                          | -1.29054 | -0.80780 | 1.69904  |
| O                          | 4.09456  | -0.29724 | 0.55905  |
| O                          | -1.51308 | -1.06312 | 4.06829  |
| O                          | -3.46538 | -0.66292 | 2.70610  |

|   |          |          |          |
|---|----------|----------|----------|
| O | 0.20429  | 2.09589  | 3.48594  |
| O | -2.04176 | 2.63276  | 2.86793  |
| N | -0.75542 | -2.30995 | -0.70905 |
| N | 3.33843  | 2.51653  | 1.12935  |
| C | 0.25538  | -3.24193 | -0.71761 |
| C | 4.48394  | 4.32731  | 2.09494  |
| C | -1.98021 | -2.74917 | -0.92944 |
| C | 0.02460  | -4.61501 | -0.94014 |
| C | 2.40170  | 5.47984  | -0.79045 |
| C | 1.15723  | -5.49006 | -0.91656 |
| C | 3.94241  | 5.17607  | 1.18255  |
| C | 3.04188  | 4.69763  | 0.19955  |
| C | 2.60660  | -3.61743 | -0.47069 |
| C | 1.56283  | -2.72919 | -0.44644 |
| C | -2.29733 | -4.08197 | -1.14056 |
| C | -1.32522 | -5.00549 | -1.15955 |
| C | 1.45870  | 4.91087  | -1.58704 |
| C | 2.73585  | 3.33138  | 0.21751  |
| C | 1.14324  | 3.57406  | -1.51747 |
| C | 2.40138  | -4.97739 | -0.70705 |
| C | 4.17080  | 2.99784  | 2.04819  |
| C | 1.79264  | 2.72329  | -0.66197 |
| C | -0.45660 | -6.16059 | 2.32960  |
| C | -1.46740 | -5.22860 | 2.33817  |
| C | 0.76820  | -5.72137 | 2.54999  |
| C | -1.23661 | -3.85552 | 2.56070  |
| C | -2.36924 | -2.98048 | 2.53712  |
| C | -3.81861 | -4.85311 | 2.09124  |
| C | -2.77484 | -5.74135 | 2.06700  |
| C | 1.08532  | -4.38856 | 2.76112  |
| C | 0.11321  | -3.46504 | 2.78010  |
| C | -3.61339 | -3.49314 | 2.32761  |
| C | -1.14730 | 7.25386  | 0.26912  |
| C | -2.29282 | 5.44308  | -0.69647 |
| C | -0.21057 | 4.29055  | 2.18893  |
| C | -1.75128 | 4.59432  | 0.21592  |
| C | -0.85075 | 5.07277  | 1.19892  |
| C | 0.73243  | 4.85952  | 2.98551  |
| C | -0.54472 | 6.43901  | 1.18096  |
| C | 1.04789  | 6.19634  | 2.91594  |
| C | -1.97967 | 6.77255  | -0.64972 |
| C | 0.39849  | 7.04711  | 2.06044  |
| H | -2.02278 | 1.51371  | -1.21024 |
| H | -2.53688 | 0.74406  | 0.13597  |

|   |          |          |          |
|---|----------|----------|----------|
| H | 0.09242  | -0.98630 | -2.56364 |
| H | 0.91538  | 0.42377  | -2.32148 |
| H | 1.08990  | 0.74552  | 2.79317  |
| H | 2.36393  | 0.15784  | 1.86092  |
| H | 5.17424  | 4.70633  | 2.86779  |
| H | -2.77060 | -1.98047 | -0.91100 |
| H | 4.18478  | 6.25274  | 1.19131  |
| H | 3.61629  | -3.23119 | -0.25943 |
| H | -3.35385 | -4.35602 | -1.28122 |
| H | -1.54646 | -6.07502 | -1.31506 |
| H | 0.91458  | 5.54491  | -2.30858 |
| H | 0.35565  | 3.15566  | -2.16700 |
| H | 3.27510  | -5.65138 | -0.69321 |
| H | 4.60927  | 2.26248  | 2.74547  |
| H | 3.83969  | 0.68411  | 0.58715  |
| H | 3.26639  | -0.76638 | 0.20984  |
| H | 1.60904  | -6.44142 | 2.54288  |
| H | -4.85071 | -5.20398 | 1.90977  |
| H | 2.13469  | -4.08935 | 2.90593  |
| H | 0.34789  | -2.39823 | 2.93526  |
| H | -4.45925 | -2.78467 | 2.32918  |
| H | -2.98571 | 5.05846  | -1.46343 |
| H | -1.98669 | 3.52062  | 0.21602  |
| H | 1.23978  | 4.20375  | 3.71338  |
| H | 1.82774  | 6.58583  | 3.59412  |
| H | -2.43490 | 7.45719  | -1.38805 |
| H | 0.60361  | 8.12602  | 1.99923  |
| H | -0.90471 | 8.33084  | 0.28398  |
| H | 2.61713  | 6.56035  | -0.84872 |
| H | -2.91219 | -6.81690 | 1.87408  |
| H | -0.68196 | -7.22229 | 2.14355  |
| H | 0.99449  | -6.56922 | -1.07309 |

**Table S17.** The possible hydrogen bonds in  $1 \cdot 3\text{H}_2\text{O}$  at 150 K calculated by PLATON.

| D-H...A            | d(D- H) | d(H...A) | d(D...A) | <(DHA) |
|--------------------|---------|----------|----------|--------|
| O(1)-H(1A)...O(6)  | 0.84    | 1.87     | 2.6914   | 165    |
| O(1)-H(1B)...O(11) | 0.85    | 2.23     | 2.9820   | 147    |
| O(2)-H(2A)...O(3)  | 0.85    | 1.88     | 2.6771   | 156    |
| O(2)-H(2B)...O(14) | 0.85    | 1.95     | 2.7338   | 154    |
| O(3)-H(3A)...O(12) | 0.85    | 1.97     | 2.8002   | 168    |
| O(3)-H(3B)...O(1)  | 0.85    | 1.94     | 2.7826   | 169    |
| O(5)-H(5A)...O(2)  | 0.85    | 1.87     | 2.6606   | 154    |
| O(5)-H(5B)...O(9)  | 0.85    | 1.99     | 2.7730   | 152    |
| O(7)-H(7B)...O(1)  | 0.85    | 1.90     | 2.7341   | 171    |
| O(7)-H(7B)...O(9)  | 0.85    | 2.11     | 2.9153   | 159    |
| O(8)-H(8A)...O(2)  | 0.85    | 1.85     | 2.6948   | 173    |
| O(8)-H(8B)...O(11) | 0.85    | 1.95     | 2.7569   | 159    |

**Table S18.** The possible hydrogen bonds in  $1 \cdot 3\text{H}_2\text{O}$  at 300 K calculated by PLATON.

| D-H...A            | d(D- H) | d(H...A) | d(D...A) | <(DHA) |
|--------------------|---------|----------|----------|--------|
| O(1)-H(1A)...O(6)  | 0.85    | 1.88     | 2.7168   | 166    |
| O(1)-H(1B)...O(11) | 0.85    | 2.24     | 3.0482   | 142    |
| O(2)-H(2A)...O(3)  | 0.85    | 1.89     | 2.6966   | 158    |
| O(2)-H(2B)...O(14) | 0.85    | 1.98     | 2.7427   | 150    |
| O(3)-H(3A)...O(12) | 0.85    | 2.00     | 2.8139   | 160    |
| O(3)-H(3B)...O(1)  | 0.85    | 1.96     | 2.7826   | 171    |
| O(5)-H(5A)...O(2)  | 0.85    | 1.88     | 2.8081   | 154    |
| O(5)-H(5B)...O(9)  | 0.85    | 2.00     | 2.6740   | 154    |
| O(7)-H(7B)...O(1)  | 0.85    | 1.91     | 2.7863   | 171    |
| O(7)-H(7B)...O(9)  | 0.85    | 2.13     | 2.9529   | 164    |
| O(8)-H(8A)...O(2)  | 0.85    | 1.89     | 2.7136   | 163    |
| O(8)-H(8B)...O(11) | 0.85    | 1.95     | 2.7603   | 159    |



**Table S19.** The possible hydrogen bonds in **1**·H<sub>2</sub>O at 353 K calculated by PLATON.

| D-H...A            | d(D- H) | d(H...A) | d(D...A) | <(DHA) |
|--------------------|---------|----------|----------|--------|
| O(3)-H(3A)...O(10) | 0.87    | 2.03     | 2.8692   | 163    |
| O(3)-H(3B)...O(6)  | 0.87    | 2.13     | 2.9068   | 148    |
| O(4)-H(4A)...O(9)  | 0.85    | 1.90     | 2.6836   | 152    |
| O(4)-H(4B)...O(12) | 0.85    | 2.24     | 2.9860   | 147    |
| O(5)-H(5A)...O(7)  | 0.87    | 1.93     | 2.7495   | 157    |
| O(5)-H(5B)...O(6)  | 0.87    | 2.41     | 3.2081   | 152    |
| O(6)-H(6B)...O(1)  | 0.85    | 1.91     | 2.7596   | 174    |
| O(6)-H(6B)...O(12) | 0.85    | 2.12     | 2.9574   | 168    |

**Table S20.** The possible hydrogen bonds in **1**·H<sub>2</sub>O at 400 K calculated by PLATON.

| D-H...A            | d(D- H) | d(H...A) | d(D...A) | <(DHA) |
|--------------------|---------|----------|----------|--------|
| O(3)-H(3A)...O(10) | 0.86    | 2.33     | 2.8702   | 121    |
| O(3)-H(3B)...O(6)  | 0.86    | 2.56     | 2.9966   | 113    |
| O(3)-H(3B)...O(10) | 0.86    | 2.56     | 2.8702   | 102    |
| O(4)-H(4A)...O(9)  | 0.85    | 1.91     | 2.6643   | 147    |
| O(4)-H(4B)...O(12) | 0.85    | 2.28     | 3.0005   | 142    |
| O(5)-H(5A)...O(7)  | 0.87    | 2.03     | 2.7533   | 140    |
| O(5)-H(5B)...O(6)  | 0.87    | 2.33     | 3.1378   | 155    |
| O(6)-H(6B)...O(1)  | 0.85    | 1.94     | 2.7685   | 165    |
| O(6)-H(6B)...O(12) | 0.85    | 2.12     | 2.9623   | 170    |

**Reference**

- (1) SAINT Software Users Guide, version 7.0; Bruker Analytical Xray Systems: Madison, WI, **1999**.
- (2) Sheldrick, G. M. SADABS, version 2.03; Bruker Analytical X-ray Systems: Madison, WI, **2000**.
- (3) Sheldrick, G. M. SHELXTL, version 6.14; Bruker AXS, Inc.: Madison, WI, **2000–2003**.
- (4) Dolomanov, O. V.; Bourhis, L. J.; Gildea, R. J.; Howard, J. A. K.; Puschmann, H. OLEX2: A Complete Structure Solution, Refinement and Analysis Program. *J. Appl. Crystallogr.* **2009**, 42 (2), 339–341.
- (5) Neese, F. Software Update: The ORCA Program System, Version 4.0. Wiley Interdiscip. Rev. Comput. Mol. Sci. **2018**, 8, 1–6.
- (6) Neese, F.; Wennmo, F.; Becker, U.; Riplinger, C. The ORCA Quantum Chemistry Program Package. *J. Chem. Phys.* **2020**, 152.
- (7) Grimme, S.; Antony, J.; Ehrlich, S.; Krieg, H. A Consistent and Accurate Ab Initio Parametrization of Density Functional Dispersion Correction (DFT-D) for the 94 Elements H-Pu. *J. Chem. Phys.* **2010**, 132.
- (8) Grimme, S.; Ehrlich, S.; Lars, G. Effect of the Damping Function in Dispersion Corrected Density Functional Theory. *J. Comput. Chem.* **2011**, 32, 1456–1465.
- (9) I. F. Galván, M. Vacher, A. Alavi, C. Angeli, F. Aquilante, J. Autschbach, J. J. Bao, S. I. Bokarev, N. A. Bogdanov, R. K. Carlson, L. F. Chibotaru, J. Creutzberg, N. Dattani, M. G. Delcey, S. S. Dong, A. Dreuw, L. Freitag, L. M. Frutos, L. Gagliardi, F. Gendron, A. Giussani, L. González, G. Grell, M. Guo, C. E. Hoyer, M. Johansson, S. Keller, S. Knecht, G. Kovačević, E. Källman, G. Li Manni, M. Lundberg, Y. Ma, S. Mai, J. P. Malhado, P. Å. Malmqvist, P. Marquetand, S. A. Mewes, J. Norell, M. Olivucci, M. Oppel, Q. M. Phung, K. Pierloot, F. Plasser, M. Reiher, A. M. Sand, I. Schapiro, P. Sharma, C. J. Stein, L. K. Sørensen, D. G. Truhlar, M. Ugandi, L. Ungur, A. Valentini, S. Vancoillie, V. Veryazov, O. Weser, T. A. Wesolowski, P.-O. Widmark, S. Wouters, A. Zech, J. P. Zobel and R. Lindh, OpenMolcas: From Source Code to Insight, *J. Chem. Theory Comput.*, 2019, **15**, 5925—5964.
- (10) F. Aquilante, J. Autschbach, A. Baiardi, S. Battaglia, V. A. Borin, L. F. Chibotaru, I. Conti, L. De Vico, M. Delcey, I. F. Galván, N. Ferré, L. Freitag, M. Garavelli, X. Gong, S. Knecht, E. D. Larsson, R. Lindh, M. Lundberg, P. Å. Malmqvist, A. Nenov, J. Norell, M. Odelius, M. Olivucci, T. B. Pedersen, L. Pedraza-González, Q. M. Phung, K. Pierloot, M. Reiher, I. Schapiro, J. Segarra-Martí, F. Segatta, L. Seijo, S. Sen, D.-C. Sergentu, C. J. Stein, L. Ungur, M. Vacher, A. Valentini and V. Veryazov, Modern quantum chemistry with [Open]Molcas, *J. Chem. Phys.*, 2020, **152**, 214117.
- (11) B. O. Roos, P. R. Taylor and P. E. M. Sigbahn, A complete active space SCF method (CASSCF) using a density matrix formulated super-CI approach, *Chem. Phys.*, 1980, **48**, 157-173.
- (12) B. O. Roos, V. Veryazov and P.-O. Widmark, Relativistic atomic natural orbital type basis sets for the alkaline and alkaline-earth atoms applied to the ground-state

- potentials for the corresponding dimers, *Theor. Chem. Acc.*, 2004, **111**, 345-351.
- (13) B. O. Roos, R. Lindh, P.-Å. Malmqvist, V. Veryazov, P.-O. Widmark and A. C. Borin, New Relativistic Atomic Natural Orbital Basis Sets for Lanthanide Atoms with Applications to the Ce Diatom and LuF<sub>3</sub>, *J. Phys. Chem. A*, 2008, **112**, 11431-11435.
- (14) P. Å. Malmqvist, B. O. Roos and B. Schimmelpfennig, The restricted active space (RAS) state interaction approach with spin-orbit coupling, *Chem. Phys. Lett.*, 2002, **357**, 230-240.
- (15) L. F. Chibotaru and L. Ungur, Ab initio calculation of anisotropic magnetic properties of complexes. I. Unique definition of pseudospin Hamiltonians and their derivation, *J. Chem. Phys.*, 2012, **137**, 064112.
